# Supplementary material
Source: PubMed Central journal article supplement (PMC8025604)
Supplement: NIHMS1680093-supplement-1.pdf [file NIHMS1680093-supplement-1.pdf]

**Data S1.** Sanger sequencing results for MS-indel recalling using selected CCLE cell lines: HCT116, Hec59, Hec1B, LOVO. Related to the **Figure 4**.

Protocol steps:

0) **Cell growth.** Cell lines were purchased from ATCC: HCT116 (ID: CCL-247), Hec1B (ID: HTB-113), LOVO (ID: CCL-229) or Addexbio Technologies: Hec59 (ID: C0026001). Obtained cell lines were grown for 2 passages in cell culture conditions recommended by manufacturer: DMEM media (Corning-Cellgro, cat: 10-013-CM) supplemented with 10% FBS (Sigma-Aldrich, cat: F4135). Genomic DNA extraction was done from 107 cells using DNeasy Blood&Tissue Kit from Qiagen following manufacturer recommendations (Qiagen, ID: 69504).

1) **Primer Design.** Primers are designed to anneal around the microsatellite region of interest. Each primer has 5'-end overhangs encoding T7 or M13-BW complementary sequences suitable for sanger sequencing using T7 or M13-BW primers.

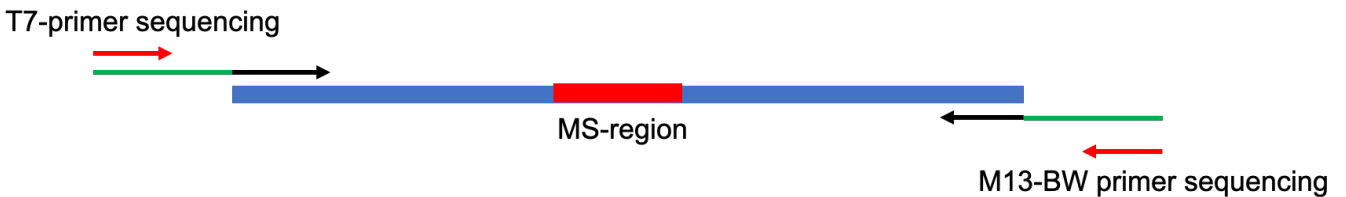

2) **High-fidelity PCR.** PCR was performed using ready-to-use 2x CloneAmp HiFi PCR premix (Takara, cat: 639298). PCR amplifications were done using standard BioRad thermocycle with PCR cycle setup as following: first melting step 95C – 2m; cycle repeated 35x: 95C – 15s, 55C – 30s, 72C – 30s; final extension step 72C – 2m; hold at 16C. Primers used for amplification are listed in the table below:

|         |            |                                                                      |
|---------|------------|----------------------------------------------------------------------|
| oVR1011 | COBL1_fw   | TAATACGACTCACTATAGGGTGTAAACGACGGCCAGT GTACCAGTTTGAAAGTCAGGAGG        |
| oVR1012 | COBL1_bw   | CAGGAAACAGCTATGAC ATTTAGGTGACACAG CCTCTAGAACTCTAGAATATCCTGTGTG       |
| oVR1013 | DOCK3_fw   | TAATACGACTCACTATAGGGTGTAAAACGACGGCCA GTTTATCCATAGCCCTCAATGCTG        |
| oVR1014 | DOCK3_bw   | CAGGAAACAGCTATGACATTTAGGTGACACTATAG CTGCAGCTCAAGTGTGGCTCTG           |
| oVR1015 | GRIK2_fw   | TAATACGACTCACTATAGGGTGTAAAACGACGGCCA CAATTCTTCAGCTGCAAGAGGAAG        |
| oVR1016 | GRIK2_bw   | CAGGAAACAGCTATGACATTTAGGTGACACTATAG GAATGACATAAGACAATTTAGAGCAATAGTTC |
| oVR1017 | KMT2C_fw   | TAATACGACTCACTATAGGGTGTAAAACGACGGCCAG CTGAGTGAGCAGAAGCCTGTGAG        |
| oVR1018 | KMT2C_bw   | CAGGAAACAGCTATGACATTTAGGTGACACTATAG CTGGATGACCTCTTAAGGTGAGGAG        |
| oVR1019 | RNF43_fw   | TAATACGACTCACTATAGGGTGTAAAACGACGGCCA CACACTGGCTGTGAATTTGAGTAA        |
| oVR1020 | RNF43_bw   | CAGGAAACAGCTATGACATTTAGGTGACACTA CTGATCAGCAAGTCACCAGATCCAACCTC       |
| oVR1021 | SEC31A_fw  | TAATACGACTCACTATAGGGTGTAAAACG GCTCTTTATAAGGCTCTTAATTTTCATGATG        |
| oVR1022 | SEC31A_bw  | CAGGAAACAGCTATGACATTTAGGTGACACTATAG CTTCATCAGGGAGCTGAGCAG            |
| oVR1023 | XYLT2_fw   | TAATACGACTCACTATAGGGTGTAAAACGACGGCCAGT GAAAAGCCGACGAGGGCTGAG         |
| oVR1024 | XYLT2_bw   | CAGGAAACAGCTATGACATTTAGGTGACACTATAG GGCCTGCTGTATGTCAGAAGGG           |
| oVR1025 | ZBTB20_fw  | TAATACGACTCACTATAGGGTGTAAAACGAC GAGAGAAAGATACTACTTATCCGTCAGAC        |
| oVR1026 | ZBTB20_bw  | CAGGAAACAGCTATGACATTTAGGTGACACTATAG CACACACAGGAGTGAGGGCATAAC         |
| oVR1027 | BMPR2_fw   | TAATACGACTCACTATAGGGTGTAAAACGACGGCC CAACCTGTACATAATAGGCGTGTG         |
| oVR1028 | BMPR2_bw   | CAGGAAACAGCTATGACATTTAGGTGACACTATAG CTGTGCAACATTTGTGGTATGCAG         |
| oVR1029 | CCDC168_fw | TAATACGACTCACTATAGGGTGTAAAACGA GTAATGTCAGCTATGAAAAACGGTAGTAAG        |
| oVR1030 | CCDC168_bw | CAGGAAACAGCTATGACATTTAGGTGACACTATAG CAGCAGTCATTGGACCCAGATTAC         |
| oVR1031 | EIF2B3_fw  | TAATACGACTCACTATAGGGTGTAAAACGACGGCC CATCAACTCTAGCACAGAATCTGT         |
| oVR1032 | EIF2B3_bw  | CAGGAAACAGCTATGACATTTAGGTGACA ATTGTCCTTTATGATATTGACTTTTCCATC         |
| oVR1033 | PLEKHA6_fw | TAATACGACTCACTATAGGGTGTAAAACGACGGCCA GATTGGGCAAGCCAGGAAGCATG         |
| oVR1034 | PLEKHA6_bw | CAGGAAACAGCTATGACATTTAGGTGACACTATAG AACAGCCTGCCAGCCCAATG             |
| oVR1035 | SETD1B_fw  | TAATACGACTCACTATAGGGTGTAAAACGACGGCCAG GAGCCAGCGAGACAGCTCCTTC         |
| oVR1036 | SETD1B_bw  | CAGGAAACAGCTATGACATTTAGGTGACACTATAG CTACTACC GCCAGGCTGAAATG          |

|         |            |                                                               |
|---------|------------|---------------------------------------------------------------|
| oVR1037 | SLAMF1_fw  | TAATACGACTCACTATAGGGTGTAAAACGACGGCC CACTGACGTTTAGTGACTTTAGGAG |
| oVR1038 | SLAMF1_bw  | CAGGAAACAGCTATGACATTTAGGTGACACTATAG CAGGGCTTTGTTCCATTGTGCC    |
| oVR1039 | SLC35G2_fw | TAATACGACTCACTATAGGGTGTAAAACGA GATTATCTGAAGAAATGGATACTTCTCCCT |
| oVR1040 | SLC35G2_bw | CAGGAAACAGCTATGACATTTAGGTGACACTA CAGAAACAAGCCTAGTGATAAGAGCTAC |
| oVR1041 | TTK_fw     | TAATACGACTCACTATAGGGTGTAAAACGAC CAACTGTAAGAACAAGAGAGAAATAATG  |
| oVR1042 | TTK_bw     | CAGGAAACAGCTATGACATTTAGGTGACAC CAGTGCCATAAGTGTTGCTATTTTTACAG  |
| oVR1043 | VCP_fw     | TAATACGACTCACTATAGGGTGTAAAACGACGGCC GAGGACTCATGCAAGTCTCCACAG  |
| oVR1044 | VCP_bw     | CAGGAAACAGCTATGACATTTAGGTGACAC GAGACATCTAGTTTTGTTAGTGCTTGAATC |
| oVR1045 | DCAF13_fw  | TAATACGACTCACTATAGGGTGTAAAACGACGGC CAGTGTATACTGGGATTGATCATCAC |
| oVR1046 | DCAF13_bw  | CAGGAAACAGCTATGACATTTAGGTGACACTA CTCTAGTATCTGGGACTAAACTGCTGGG |

3) **Sanger Sequencing.** After amplification, PCR reactions were purified on the PCR cleanup column (Qiaquick PCR purification kit, Qiagen cat: 28104). Obtained DNA was sent for sanger sequencing with standard T7-and M13-BW primers at Genscript (<https://www.genscript.com>).

4) **Analysis of sequencing results.** Obtained sequencing results and reference sequences of target genomic loci (shown in FASTA format below) were aligned using Clustal Omega multiple sequence alignment tool. Alignments were visualized using EBI available visualization tools (<https://www.ebi.ac.uk/Tools/msa/>).

#### **AASDH MS locus analysis:**

>AASDH\_reference

```
ATAATAGAGACCCAGCACAGAAAATTGGTGGTGGCTGCTTCTACTACTTACATATATTAATAGATATTC
AATATTTAAATAGTTCTACCTGTTGCACAAGTTCAATGTTAAGACGTTTGCCATGACGTTTGATCTGACTG
TCTTTTCGTCCCAAAAAAAAAAATCTCTCCATCTTTCACAGTCACAAAGTCTCCTGTAGCTCGCATTGTGCC
AAGTGGTACTGTCACCTTCATCATCAAGAAAACACACTCTGTTTCTGCCACCTTCCCAAGATATAAACACCA
ATGTCATAAAAATCCAAGGG
```

>HCT116\_AASDH\_T7

```
ACGACTGCAGTGAGACCAGCACAGAGATTCCGTGCTAGTGACGTGCTCACTCACAACCTTACATATACTG
ATATACGCATATTCAATATTTAAATAGTTCTACCTGTTGCACAAGTTCAATGTTAAGACGTTTGCCATGAC
GTTTGATCTGACTGTCTTTTCGTCCCAAAAAAAAAAATCTCTCCATCTTTCACAGTCACAAAGTCTCCTGTA
GCTCGCATTGTGCCAAGTGGTACTGTCACTTCATCATCAAGAAAACACACTCTGTTTCTGCCACCTTCCCA
AGATATAAACACCAATGTCATAAAAATCCAAGCTATAGTGTACCTAAATGTCAAGCAGTTTTCTGAGA
AATCGGCTACTGAAGAGCTGTGGCCTTCGTTTTACACCCTATATGGAAAAAAGAAAAAATTAGTCAGATT
GGGAAG
```

>HCT116\_AASDH\_M13

```
AAACACCTCGAAATATAGGGGGCCCATATGGTTTATACGACTCCCCTATAGGGTGTAAAACGAAGGCC
ACCCAACCAGGGCAACCGTTTTTAAATACGACTCACTATAGGGTGTAAACGACGGCCAGTGAGACCCC
AGCACAGAAAATTGGTGGTGGCTGCTTCTACTACTTACATATATTAATAGATATTCAATATTTAAATAGTT
CTACCTGTTGCACAAGTTCAATGTTAAGACGTTTGCCATGACGTTTGATCTGACTGTCTTTTCGTCCCAAA
AAAAAATCTCTCCATCTTTCACAGTCACAAAGTCTCCTGTAGCTCGCATTGTGCCAAGTGGTACTGTCAC
TTCATCATCATTAAACGACATCTACGATTGGGCGTACAATTGACCGGCGCATGTGAGACACCCAGCGTC
AGAAATCCAGCTGTAGCCC
```

>Hec59\_AASDH\_T7

```
ACAACGACTGCAGTGAGACCAGCACAGAAAATTCCGTGCGTAGTGACGTGGTCACTCACTACTGACATATGAC
TGATATTCGCATATTCAATATTTAAATAGTTCTACCTGTTGCACAAGTTCAATGTTAAGACGTTTGCCATG
ACGTTTGATCTGACTGTCTTTTCGTCCCAAAAAAAAAAATCTCTCCATCTTTCACAGTCACAAAGTCTCCTGTA
```

GCTCGCATTGTGCCAAGTGGTACTGTCACTTCATCATCAAGAAAACACACTCTGTTTCTGCCACCTTCCCA  
AGAAATAAACACCAATGTCATAAAAATCCAAGCTATAGTGTACCTAAATGTCAAACTTTTTCTGGAA  
AA

>Hec59\_ AASDH \_M13

GCATTTTTTAAACCGACTCCCTTTAGGGTGAAAACGCCGCCAGTGGGCCCCAGCACAGAAATTTGGT  
GGTGGCTGCTTCACTACTTACAAATATTAATAGATATTCAAATTTAAATAGTTCTACCTGTTCCACAAG  
TTCAAGGTTAAGACGTTGCCATGACGTTTGATCTGACTGTCTTTTCGTCCCAAAAAAAAAATCTCTCCATC  
TTTACAGTCACAAAGTCTCCTGTAGCTCGCATTGTGCCAAGTGGTACTGTCACTTCATCATCTTTAATAC  
GACTCACTATAGGGCGTAAACGACGGCCAGTGAGACCCCAATTCCATAAAAATGGCAAGTCTTTCCATT

>Hec1B\_ AASDH \_T7

ACGCTGCGTGAACCAGCAAGAGATCCGTGCTGGCTGGTTCTACAACGACATATCTGTTTCCTATAACAAT  
ATTTAAATAGTTCTACCTGTTGCACAAGTTCAATGTTAAGACGTTTGCCATGACGTTTGATCTGACTGTCT  
TTTCGTCCCAAAAAAAAAATCTCTCCATCTTTACAGTCACAAAGTCTCCTGTAGCTCGCATTGTGCCAAG  
TGGTACTGTCACTTCATCATCAAGAAAACACACTCTGTTTCTGCCACCTTCCAAGATATAAACACCAATG  
TCATAAAAATCCAAGCTATAGTGTACCTAAATGTCATAACTGTTTCTGGGAAAAA

>Hec1B\_ AASDH \_M13

CTTTTCCTTTAACATATCAGTTTCTTACTCCCGTCCACTTTTCGGCGTAAAAGGGCCGCCAGCGGCGG  
CCGCTCTTTAATACGACTCACTATAGGGTGTAAACGACGGCCAGTGAGACCCAGCACAGAAAATTGG  
TGGTGGCTGCTTCTACTACTTACATATTAATAGATATTCAATATTTAAATAGTTCTACCTGTTGCACAA  
GTTCAATGTTAAGACGTTTGCCATGACGTTTGATCTGACTGTCTTTTCGTCCCAAAAAAAAAATCTCTCCA  
TCTTTACAGTCACAAAGTCTCCTGTAGCTCGCATTGTGCCAAGTGGTACTGTCACTTCATCATCATTAAAT  
ACGACCTCTACGATTGGGCGTACAACGACGGCGCATGTGAGACACCCAGCACAGAAAATCCAAGGCTCT  
ACCC

**Alignment\_result\_AASDH\_MS\_region:**

|                 |                                                              |     |
|-----------------|--------------------------------------------------------------|-----|
| Hec59_1_M13     | TTGCCATGACGTTTGATCTGACTGTCTTTTCGTCCCAA-AAAAATCTCTCCATCTTT    | 214 |
| HCT116_1_M13    | TTTGCCATGACGTTTGATCTGACTGTCTTTTCGTCCCAAAAAAAAAATCTCTCCATCTTT | 300 |
| Hec1B_1_M13     | TTTGCCATGACGTTTGATCTGACTGTCTTTTCGTCCCAAAAAAAAAATCTCTCCATCTTT | 287 |
| Hec1B_1_T7      | TTTGCCATGACGTTTGATCTGACTGTCTTTTCGTCCCAAAAAAAAAATCTCTCCATCTTT | 173 |
| AASDH_reference | TTTGCCATGACGTTTGATCTGACTGTCTTTTCGTCCCAAAAAAAAAATCTCTCCATCTTT | 176 |
| HCT116_T7_1     | TTTGCCATGACGTTTGATCTGACTGTCTTTTCGTCCCAAAAAAAAAATCTCTCCATCTTT | 189 |
| Hec59_1_T7      | TTTGCCATGACGTTTGATCTGACTGTCTTTTCGTCCCAA-AAAAATCTCTCCATCTTT   | 190 |
|                 | ** *****                                                     |     |

**Conclusion: Hec59 has deletion**

**ACVR2A MS locus analysis:**

>ACVR2A\_reference

ATATTTTAGAAAGTTTGTACCAGTTTGAAAGTCAGGAGGATTTAATGAAAATGATTTATTTACTTTTCT  
TACTTTTCAGGACCTGTAGATGAATACATGTTGCCATTTGAGGAGGAAATTGGCCAGCATCCATCTCTTG  
AAGACATGCAGGAAGTTGTTGTGCATAAAAAAAGAGGCCTGTTTTAAGAGATTATTGGCAGAAACATG  
CTGTAAGTTATCCAGTTAGCTTTTCATTTGAAATCCAATAAACACTTTTCAGAGGAATTATTTATCTCTG  
CACATTTCTCTTCTCTGCAAGTATTTCTGGAAGGTGATCTTCACACAGGATATTCTAGAGTTCTAGAG  
GCAGAATTAGGGCT

>LoVo\_ ACVR2A\_T7

CCGAAGGCAGTGTACAGTTTGAGTCAGGAGGATCTAAAGGTCTATGATGCTAGTGTTACTTTTCTGACTT  
ATCTGGATCCGTAAATGAATACATGTTGCCATTTGAGGAGGAAATTGGCCAGCATCCATCTCTTGAAGAC  
ATGCAGGAAGTTGTTGTGCATAAAAAAAGAGGCCTGTTTTAAGAGATTATTGGCAGAAACATGCTGTAA

GTTATCCAGTTAGCTTTTCATTTGAAATTCCAATAAAACACTTTTCAGAGGAATTATTTATCTCTGCACATT  
TCTCTTTCTTCTGCAAGTATTTTCTGGAAGGTGATCTTCACACAGGATATTCTAGAGTTCTAGAGGCTGTG  
TCACCTAAATGTCATAGCAAATTTCTGGGGAGAGGG

>LoVo\_ ACVR2A\_M13

TTAATTTTTGTTTCACTTTTGGGTGTAAACGACGGCCAGTGTACCAGTTTGAAAGTCAGGAGGATTTTAA  
TGAAAATGATTTATTTTACTTTTTCTTACTTTTCAGGACCTGTAGATGAATACATGTTGCCATTTGAGGAGG  
AAATTGGCCAGCATCCATCTCTTGAAGACATGCAGGAAGTTGTTGTGCATAAAAAAAGAGGCCTGTTTT  
AAGAGATTATTGGCAGAAACATGCTGTAAGTTATCCAGTTAGCTTTTCATTTGAAATTCCAATAAAACAC  
TTTTCAGAGGAATTATTTTATTACCACTCTTCTTATGGTGTAAACAGACGGCCAGGTACCAGTCGAAACTCA  
GGATTTCTAGAGTCTAGAGGTTATTCCT

>Hec1B\_ ACVR2A\_T7

ACGACTGCAGTGTACAGTTTGAGTCAGGAGATATCTATAATGTTCTATGAAGTGTCTAGTGTTCACTCTT  
TCTGACTTTTTCTGGACCCGGAATGAATACATGTTGCCATTTGAGGAGGAAATTGGCCAGCATCCATCTC  
TTGAAGACATGCAGGAAGTTGTTGTGCATAAAAAAAGAGGCCTGTTTTAAGAGATTATTGGCAGAAAC  
ATGCTGTAAGTTATCCAGTTAGCTTTTCATTTGAAATTCCAATAAAACACTTTTCAGAGGAATTATTTATCT  
CTGCACATTTCTCTTTCTTCTGCAAGTATTTTCTGGAAGGTGATCTTCACACAGGATATTCTAGAGTTCTA  
GAGGCTGTGTCACCTAAATGTCATAGCTGTTTCCTAAAGA

>Hec1B\_ ACVR2A\_M13

TTTTTTAATACGACTCACTATAGGGTGTAAACGACGGCCAGTGTACCAGTTTGAAAGTCAGGAGGATTT  
TAATGAAAATGATTTATTTTACTTTTTCTTACTTTTCAGGACCTGTAGATGAATACATGTTGCCATTTGAGG  
AGGAAATTGGCCAGCATCCATCTCTTGAAGACATGCAGGAAGTTGTTGTGCATAAAAAAAGAGGCCTG  
TTTTAAGAGATTATTGGCAGAAACATGCTGTAAGTTATCCAGTTAGCTTTTCATTTGAAATTCCAATAAAA  
CACTTTTCAGAGGAATTATTTTATTTGCACTCTTCTTTGGTGTAAAAGACGGCCAGGAACCAGTCGAAA  
CTCAGGATATCTAGAGTCAGAGGGAACCCTC

>Hec59\_ ACVR2A\_T7

TCGAGGGGGGCGGTGTTTCAGTTTGAAGTCAGGAGGATTTAATGAAAATGATTTATTTTACTTTTTCTTAC  
TTTTCAGGACCTGGAGATGAATACATGTTGCCATTTGAGGAGGAAATTGGCCAGCATCCATCTCTTGAA  
GACATGCAGGAAGTTGTTGTGCATAAAAAAAGAGGCCTGTTTTAAGAGATTATTGGCAGAAACATGCTG  
TAAGTTATCCAGTTAGCTTTTCATTTGAAATTCCAATAAAACACTTTTCAGAGGAATTATTTATCTCTGCAC  
ATTTCTCTTTCTTCTGCAAGTATTTTCTGGAAGGTGATCTTCACACAGGATATTCTAGAGTTCTAGAGGCT  
GTGTCACCTAAATGTCATAGCTGTTTCCTGAAGA

>Hec59\_ ACVR2A\_M13

TATTTTTAATACGACTCACTATAGGGTGTAAACGACGGCCAGTGTACCAGTTTGAAAGTCAGGAGGATTT  
TAATGAAAATGATTTATTTTACTTTTTCTTACTTTTCAGGACCTGTAGATGAATACATGTTGCCATTTGAGG  
AGGAAATTGGCCAGCATCCATCTCTTGAAGACATGCAGGAAGTTGTTGTGCATAAAAAAAGAGGCCTGT  
TTAAGAGATTATTGGCAGAAACATGCTGTAAGTTATCCAGTTAGCTTTTCATTTGAAATTCCAATAAAAC  
ACTTTTCAGAGGAATTATTTATCTTTGCACATTTCTCTTTCTTCTGCAAGTATTTTCTGGAAGGTGATCTTCA  
CACAGGATATCTAGAGTCAGAGGACCCC

>HCT116\_ ACVR2A\_T7

ACAACGCAGTGTACAGTTTGAGTCAGGATATTCTAGAGTTCTATGAGGCTGTGTCACCTATCTGTCTTAT  
CTGTTTCCGTAGATGAATACATGTTGCCATTTGAGGAGGAAATTGGCCAGCATCCATCTCTTGAAGACAT  
GCAGGAAGTTGTTGTGCATAAAAAAAGAGGCCTGTTTTAAGAGATTATTGGCAGAAACATGCTGTAAGT  
TATCCAGTTAGCTTTTCATTTGAAATTCCAATAAAACACTTTTCAGAGGAATTATTTATCTCTGCACATTTT

TCTTTCTTCTGCAAGTATTTTCTGGAAGGTGATCTTCACACAGGATATTCTAGAGTTCTAGAGGCTGTGTC  
 ACCTAAATGTCATAGCTGTTTCCTAAAAA  
 >HCT116\_ACVR2A\_M13  
 TCTTTTTAATACGACTCACTATAGGGTGTAACGACGGCCAGTGTACCAGTTTGAAAGTCAGGAGGATT  
 TAATGAAAATGATTTATTTTACTTTTCTTACTTTTTCAGGACCTGTAGATGAATACATGTTGCCATTTGAGG  
 AGGAAATTGGCCAGCATCCATCTCTTGAAGACATGCAGGAAGTTGTTGTGCATAAAAAAAGAGGCCTGT  
 TTTAAGAGATTATTGGCAGAAACATGCTGTAAGTTATCCAGTTAGCTTTTCATTTGAAATTCCAATAAAAC  
 ACTTTTCAGAGGAATTATTTTATTACGACTCACTATAGGGTGTAAGACGGCCAGTGTACGCAGATCTG  
 AAAGTCAGGATATCTAGAGTCAGAGGTACCCC

**Alignment\_result\_ACVR2A\_MS\_region:**

|                  |                                                              |     |
|------------------|--------------------------------------------------------------|-----|
| Hec1B_2_T7       | AAGTTGTTGTGCATAAAAAAAGAGGCCTGTTTTAAGAGATTATTGGCAGAAACATGCTG  | 215 |
| LoVo_T7_2        | AAGTTGTTGTGCATAAAAA-AAGAGGCCTGTTTTAAGAGATTATTGGCAGAAACATGCTG | 206 |
| HCT116_2_T7      | AAGTTGTTGTGCATAAAAA-AAGAGGCCTGTTTTAAGAGATTATTGGCAGAAACATGCTG | 204 |
| HCT116_2_M13     | AAGTTGTTGTGCATAAAAA-AAGAGGCCTGTTTTAAGAGATTATTGGCAGAAACATGCTG | 239 |
| LoVo_2_M13       | AAGTTGTTGTGCATAAAAA-AAGAGGCCTGTTTTAAGAGATTATTGGCAGAAACATGCTG | 236 |
| Hec1B_2_M13      | AAGTTGTTGTGCATAAAAAAAGAGGCCTGTTTTAAGAGATTATTGGCAGAAACATGCTG  | 240 |
| Hec59_2_M13      | AAGTTGTTGTGCATAAAAA-AAGAGGCCTGTTTTAAGAGATTATTGGCAGAAACATGCTG | 239 |
| ACVR2A_reference | AAGTTGTTGTGCATAAAAAAAGAGGCCTGTTTTAAGAGATTATTGGCAGAAACATGCTG  | 213 |
| Hec59_2_T7       | AAGTTGTTGTGCATAAAAA-AAGAGGCCTGTTTTAAGAGATTATTGGCAGAAACATGCTG | 208 |
|                  | *****                                                        |     |

**Conclusion: LoVo, HCT116, Hec59 has MS-related deletion**

**DOCK3 MS locus analysis:**

>DOCK3\_reference  
 GCCAGTGTAAGAGAGGTTTATCCATAGCCCTCAATGCTGAGGGGTCCCCAGGGGACTCTTCTCATGCC  
 TGCCCAGTTGGCCAGCAAGATGGTGTGCTGGCATGAAGTCTGTGCAGGGCCCCCAGCTGAGGCTCTGGTT  
 CTGTTCCCTTTGCAGGTCATTACTCCCTACACTTTGACGCCTTCCACCACCCTCTGGGTGATACCCCCCA  
 GCCCTCCCTGCCCGACCCTGCGCAAGGTAATGTACTGAAGCGGCAGCCCCACCAGGCTGTGAGATGA  
 GTCATCTCGTCTGCTCTAGAACCACCCTTGGGGTCTACAGGAGGAACTGGAGCCCTCCCCTTACCTCTC  
 TCCCCAGCCTGGCAGAAGCTGGGGGTGGCCAGAGCCACACTTGAGCTGCAGGTG  
 >Hec1B\_DOCK3\_T7  
 ACGCGGCAGTATCCATAGCCCTCTTGGACTGGCCTTATATGGCACCAAATTGTCAAACTTTTTTCGGGAA  
 TCAAGATGGTGCTGGCATGAAGTCTGTGCAGGGCCCCCAGCTGAGGCTCTGGTTCTGTTCCCTTTGCAG  
 GTCATTACTCCCTACACTTTGACGCCTTCCACCACCCTCTGGGTGATACCCCCCAGCCCTCCCTGCCCGG  
 ACCCTGCGCAAGGTAATGTACTGAAGCGGCAGCCCCACCAGGCTGTGAGATGAGTCATCTCGTCTGCTC  
 TAGAACCACCCTTGGGGTCTACAGGAGGAACTGGAGCCCTCCCCTTACCTCTCTCCCCAGCCTGGCAGA  
 AGCTGGGGGTGGCCAGAGCCACACTTGAGCTGCAGCAATAGTGCA  
 >Hec1B\_DOCK3\_M13  
 GGGACTTTTGTGCATGCATGTCAAGGTCAGCCAGCAAGATGGTGTGTCGTAAGTTTGGGCAGGCCCCC  
 AGCCGAGGCTCTCAATTTTTTCCGTCACCATGTAATTAGCCCGGAGCCTAAAGCCCTTCCACCACCCTCTG  
 GGTGATACCCCCCAGCCCTCCCTGCCCGACCCTGCGCAAGGTAATGTACTGAAGCGGCAGCCCCACC  
 AGGCTGTGAGATGAGTCATCTCGTCTGCTCTAGAACCACCCTTGGGGTCTACAGGAGGAACTGGAGTTT  
 TTATATGAATCACTATAGGGTGTAAGACGACGGCCCGTTTATCCATAGCCACACTGAGCGCAGCTTTAG  
 CCTTTT  
 >Hec59\_DOCK3\_T7  
 ACAGCTGCAGTATCCATAGCCCTCCTGGAGCTGCAGCTATAGTGTACCTAAATGTCAAAGCTTTTTTCGG  
 GAAGCAAGATGGTGCTGGCATGAATTCTGTGCAGGGCCCCCAGCTGAGGCTCTGGTTCTGTTCCCTTTG

CAGGTCATTACTCCCTACACTTTGACGCCGTCCACCACCCTCTGGGTGATACCCCCCAGCCCTCCCTGCC  
 CGGACCCTGCGCAAGGTAATGTAAGCGGCACCCCCACCAGGCTGTGAGATGAGTCATCTCGTCTG  
 CTCTAGAACCACCTTGGGGTCTACAGGAGGAACTGGAGCCCTCCCCTTACCTCTCTCCCCAGCCTGGC  
 AGAAGCTGGGGGTGGCCAGAGCCACACTTGAGCTGCAGCTATAGTGTC

>Hec59\_DOCK3\_M13

CACACCCTTAATAAGACTCACAATAGGGTGTAAAACGACGGTCAGTTAATCCATAGCCCTCAAAGCTGA  
 GGGGTCCCCAGGGGACTCTTCTCATGCCTGCCAGTTGGCCCAGCAAGATGGTGATGGCATGAAGTCTG  
 TCGGGGCCCCCATCCAAGGCTCTGAATGTGTTCCCTCACCATGTCATTACTCCCTACACTTTGACGCCTT  
 CCACCACCCTCTGGGTGATACCCCCCAGCCCTCCCTGCCCGGACCCTGCGCAAGGTAATGTAAGCGGC  
 GGCAGCCCCACCAGGCTGTGAGATGAGTCATCTCGTCTGCTCTAGAACCACCTTGGGGTCTACAGGAG  
 GAACTGGAGTTTTATACGACTCACTATAGGGTGTAAAACGACGGCCAGTTTATCCATAGCCCACACTGA  
 GCGCAGGCTAAAG

>HCT116\_DOCK3\_T7

CCAGCTGGCAGTATCCATAGCCCTCCTTGAGCTGCAGCTATAGTGTACCTAATTGTCAAACCTTTTTCGG  
 GAAGCAAGATGGTGCTGGCATGAATCTGTGCAGGGCCCCAGCTGAGGCTCTGGTTCTGTTCCCTTTCG  
 AGGTCATTACTCCCTACACTTTGACGCCTTCCACCACCCTCTGGGTGATACCCCCCAGCCCTCCCTGCCCG  
 GACCCTGCGCAAGGTAATGTAAGCGGCAGCCCCACCAGGCTGTGAGATGAGTCATCTCGTCTGCT  
 CTAGAACCACCTTGGGGTCTACAGGAGGAACTGGAGCCCTCCCCTTACCTCTCTCCCCAGCCTGGCAG  
 AAGCTGGGGGTGGCCAGAGCCACACTTGAGCTGCAGCTATAATGTAGCAAAAAT

>HCT116\_DOCK3\_M13

GGGGGTTTATCCGTGACACCCTTTTATCCTTCAAAAAAATCGTTGAAGGTCAGGGAACAGATCAGCAA  
 GATTGACCTGAGGGAGAAGAAGTAAGTGGTGCCGTCCGTGCGGTCCATCACGCCTGGGGGGTCTCCAA  
 GGGCACATGCGGGTGGGCATACTGGACGTGCCGACACAAGCACTGGCAGAGTCATATATGGCTCCCA  
 GAGGGTAATATAGTGCCTTGGTGCTTCTTTAAAATGAAGCACCTCCTCGTCAGGGCCCTTTTTTTAATAC  
 GACTCACTATAGGGTGTAAAACGACGGCCAGTTATCCATAGCCCACACTGAGCTGCAGCGTTAGCCCC

**Alignment\_result\_DOCK3\_MS\_region:**

|                 |                                                                    |     |
|-----------------|--------------------------------------------------------------------|-----|
| HCT116_4_M13    | -----CCTGGGGGTCTCCAAGGGCACATGCGGGTGGGCATACTGGA                     | 163 |
| DOCK3_reference | AGGTCATTACTCCCTACACTTTGACGCCTTCCACCACCCTCTGGGTGATACCCCCCAGC        | 211 |
| Hec1B_4_T7      | AGGTCATTACTCCCTACACTTTGACGCCTTCCACCACCCTCTGGGTGATACCCCCCAGC        | 197 |
| Hec59_4_T7      | AGGTCATTACTCCCTACACTTTGACGCCGTCCACCACCCTCTGGGTGATACCCCCCAGC        | 200 |
| HCT116_4_T7     | AGGTCATTACTCCCTACACTTTGACGCCTTCCACCACCCTCTGGGTGATACCCC--CCAGC      | 199 |
| Hec1B_4_M13     | ATGTAATTAGCCCGG-AGCCTAAAGCCCTTCCACCACCCTCTGGGTGATACCCCCCAGC        | 157 |
| Hec59_4_M13     | ATGTCATTACTCCCTACACTTTGACGCCTTCCACCACCCTCTGGGTGATACCCCCCAGC        | 239 |
|                 | * *           ****   *   * * * *   *   * * *                       |     |
| HCT116_4_M13    | CGTGTCCGACACAAGCACTGGCAGAGTCATATATGGCTC-----CCAGAGGGTA             | 212 |
| DOCK3_reference | CCTCCCTGCCCGGACCCTGCGCAAGGTAATGTAAGCGGCAGCCCCACCAGGCTGTG           | 271 |
| Hec1B_4_T7      | CCTCCCTGCCCGGACCCTGCGCAAGGTAATGTAAGCGGCAGCCCCACCAGGCTGTG           | 257 |
| Hec59_4_T7      | CCTCCCTGCCCGGACCCTGCGCAAGGTAATGTAAGCGGCAGCCCCACCAGGCTGTG           | 260 |
| HCT116_4_T7     | CCTCCCTGCCCGGACCCTGCGCAAGGTAATGTAAGCGGCAGCCCCACCAGGCTGTG           | 259 |
| Hec1B_4_M13     | CCTCCCTGCCCGGACCCTGCGCAAGGTAATGTAAGCGGCAGCCCCACCAGGCTGTG           | 217 |
| Hec59_4_M13     | CCTCCCTGCCCGGACCCTGCGCAAGGTAATGTAAGCGGCAGCCCCACCAGGCTGTG           | 299 |
|                 | * * * * *   * *   ****   * * * * *   *                   ****   ** |     |

**Conclusion: HCT116 has MS-related deletion**

**GRIK2 MS locus analysis:**

>GRIK2\_reference

ATAGCAATTCTTCAGCTGCAAGAGGAAGGCAAACCTGCATATGATGAAGGAGAAATGGTGGAGGGGCAA  
 TGTTGCCAGAAAGAGGAGAGCAAAGAGGCCAGTGCCCTGGGGGTTTCAAGATATTGGTGGCATCTTCA

TTGTTCTGGCAGCCGGCTTGGTGCTTTCAGTTTTTGTGGCAGTGGGAGAATTTTTATACAAATCCAAAA  
AAACGCTCAATTGAAAAGGTAATGTTACTTGTTCAGTTTAAATTTAAAACAATTTTTGTTGTTACAAT  
AAAACACAAACCAAAGAGTTTTTATGTTACCACTAATGATAATGCATAGAACTATTGCTCTAAATTGT  
CTTATGTCATTCATTACATAACAAAATATTATATTTTGTGAAATTTACAGAAA

>LoVo\_ GRIK2\_T7

GCGGGCTGACAAGTCTTCAGCTGCAGAGGAGGCAAACCTGCATATGATGAAGGAGAAATGGTGGAGG  
GGCAATGGTTGCCAGAAGAGGAGAGCAAAGAGGCCAGTGCCTGGGGTTT CAGAATATTGGTGGCA  
TCTTCATTGTTCTGGCAGCCGGCTTGGTGCTTTCAGTTTTTGTGGCAGTGGGAGAATTTTTATACAAATCC  
AAAAAAAACGCTCAATTGAAAAGGTAATGTTACTTGTTCAGTTTAAATTTAAAACAATTTTTGTTGTT  
ACAATAAACACAAACCAAAGAGTTTTTATGTTACCACTAATGATAATGCATAGAACTATTGCTCTAA  
ATTGCTTATGTCATTCCTATAGTGTACCTAAATGTCATAGCTGTTCCGAAAGGAG

>LoVo\_ GRIK2\_M13

AGAAGACTCATCATTGGGTGTAAAACGACGGCCACAATTCTTCAGCTGCAAGAGGAAGGCCAACTGCAT  
ATGATAAGGAGAAATGGTGGAGGGGCAATGGTTGCCAGAAGAGGAGAGCAAAGAGGCCAGTGCCT  
GGGGTTT CAGAATATTGGTGGCATCTTCATTGTTCTGGCAGCCGGCTTGGTGCTTTCAGTTTTTGTGGCA  
GTGGGAGAATTTTTATACAAATCCAAAAAAAACGCTCAATTGAAAAGGTAATGTTACTTGTTCCTTGC  
CTCATTATATAAAACAATTTTTGTTGTTACAATAAACACAAAGGAGAATTTTTATGTTACCACTAATTG  
ATAATGCATAGAACTATTTGCTCTTAAATTGTCCTTGTCTTGCCATACCGGTTTCG

>Hec1B\_ GRIK2\_T7

ACCCACTGGCCAATTCTTCAGCTGCAGAGGAGGCCAACTGCATATGATGAAGGAGAAATGGTGGAGGGG  
CAATGGTTGCCAGAAGAGGAAAGCAAAGAGGCCAGTGCCTGGGGTTT CAGAATATTGGTGGCATCT  
TCATTGTTCTGGCAGCCGGCTTGGTGCTTTCAGTTTTTGTGGCAGTGGGAGAATTTTTATACAAATCCAA  
AAAAACGCTCAATTGAAAAGGTAATGTTACTTGTTCAGTTTAAATTTAAAACAATTTTTGTTGTTACA  
ATAAAACACAAACCAAAGAATTTTTATGTTACCACTAATGATAATGCATAAACTATTGCTCTAAATTG  
TCTTATGTCATTCCTATAGTGTACCTAAATGTCATAACTGTTTCCTGGAGGA

>Hec1B\_ GRIK2\_M13

TTTTTATTTTTGACCACTATAGGGTGTAAAACGACGGCCACAATTCTTCAGCTGCAAGAGGAAGGCCAAA  
CTGCATTTGATGAAGGAGAAATGGTGGAGGGGCAATGGTTGCCAGAAGAGGAAAGCAAAGAGGCCA  
GTGCCCGGGGGTTT CAGAATATTGGTGGCATTTTTATTGTTCTGGCAGCCGGCTTGGTGCTTTCAGTTTT  
TGTGGCAGTGGGAGAATTTTTATACAAATCCAAAAAAAACGCTCAATTGAAAAGGTAATGTTACTTGT  
TTCAGTTTAAATTTAAAACAATTTTTGTTGTTACAATAAACACAAACCAAAGAGTTTTTATGTTACCAA  
CTAATGATAATGCATAGAACTATTGCTCTAAATTGCTTAGGGCATCCCTTTAGTGCC

>Hec59\_ GRIK2\_T7

AAAATCGTACAAAATTTCTTTCGGCTGCAAGAGGAGGCCAACTGCATATGATGAAGGAGAAATGGTGG  
AGGGGCAATGGTTGCCAGAAGAGGAAAGCAAAGAGGCCAGTGCCTGGGGTTT CAGAATATTGGTG  
GCATCTTCATTGTTCTGGCAGCCGGCTTGGTGCTTTCAGTTTTTGTGGCAGTGGGAGAATTTTTATACAA  
ATCCAAAAAAAACGCTCAATTGAAAAGGTAATGTTACTTGTTCATTTTAAATTTAAAACAATTTTTGT  
TGTTACAATAAACACAAACCAAAGAGTTTTTATGTTACCACTAATGATAATGCATAAACTATTGCTC  
TAAATTGCTTATGTCATTCCTATAGTGCCACCTAATTGCTTACCTGTTCCGGAAGAA

>Hec59\_ GRIK2\_M13

TTTTTATACGACTCACTATAGGGTGTAAAAGAAGGCCACAATTTTTTAGGTGCAAGAGGAAGGCCAAA  
TGCATTTGATGAAGGAGAAATGGTGGAGGGGCAATGGTTGCCAGAAGAGGAAAGCAAAGAGGCCAG  
TGCCCTGGGGTTT CAGAATATTGGTGGCATTTTTATTGTTTGGCCGCGGCTTGGTGCTTTCAGTTTTTGT  
TGGCAGTGGGAGAATTTTTATACAAATCCAAAAAAAACGCTCAATTGAAAAGGTAATGTTACTTGT

CAGTTTAAATTTAAAACAATTTTTGTTGTTACAATAAAACACAAACCAAAGAGTTTTTATGTTACCAACT  
AATGATAATGCATAGAACTATTGCTCTAAATTGCTTAGTCATCGCCTTAACCCC

>HCT116\_GRIK2\_T7

GCCACTGGCCATTCTTCAGCTGCAGAGGAGGCAAACCTGCATATGATGAAGGAGAAATGGTGGAGGGGC  
AATGGTTGCCAGAAGAGGAAAGCAAAGAGGCCAGTGCCCTGGGGGTTTCCAGAATATTGGTGGCATCTT  
CATTGTTCTGGCAGCCGGCTTGGTGCTTTAGTTTTTGTGGCAGTGGGAGAATTTTTATACAAATCCAAA  
AAAAACGCTCAATTGAAAAAGGTAAATGTTACTTGTTCAGTTTAAATTTAAAACAATTTTTGTTGTTACA  
ATAAAACACAAACCAAAGAGTTTTTATGTTACCAACTAATGATAATGCATAGAACTATTGCTCTAAATT  
GTCTTATGTCATTCTATAGTGTACCTAAATGTCATACTGTTTTCTGAAAAA

>HCT116\_GRIK2\_M13

TTTTTATAACGAACACTATAGGGTGTAAAACGACGGCCACAATTCTTCAGCTGCAAGAGGAAGGCAA  
ACTGCATATGATGAAGGAGAAATGGTGGAGGGGCAATGGTTGCCAGAAGAGGAAAGCAAAGAGGCC  
AGTGCCCTGGGGGTTTCCAGAATATTGGTGGCATCTTCATTGTTCTGGCAGCCGGCTTGGTGCTTTAGTTT  
TTGTGGCAGTGGGAGAATTTTTATACAAATCCAAAAAAACGCTCAATTGAAAAAGGTAAATGTTACTT  
GTTTCAGTTTAAATTTAAAACAATTTTTGTTGTTACAATAAAACACAAACCAAAGAGTTTTTATGTTACC  
AACTAATGATAATGCATAGAACTATGCTCTAAATGTCTTAGGCATGCGTGTTGGCG

### Alignment\_result\_GRIK2\_MS\_region:

|                 |                                                             |     |
|-----------------|-------------------------------------------------------------|-----|
| LoVo_5_M13      | GGCAGCCGGCTTGGTGCTTTAGTTTTTGTGGCAGTGGGAGAATTTTTATACAAATCCAA | 232 |
| Hec59_5_M13     | GGCCGCCGGCTTGGTGCTTTAGTTTTTGTGGCAGTGGGAGAATTTTTATACAAATCCAA | 238 |
| Hec1B_5_M13     | GGCAGCCGGCTTGGTGCTTTAGTTTTTGTGGCAGTGGGAGAATTTTTATACAAATCCAA | 240 |
| HCT116_5_M13    | GGCAGCCGGCTTGGTGCTTTAGTTTTTGTGGCAGTGGGAGAATTTTTATACAAATCCAA | 240 |
| GRIK2_reference | GGCAGCCGGCTTGGTGCTTTAGTTTTTGTGGCAGTGGGAGAATTTTTATACAAATCCAA | 203 |
| Hec59_5_T7      | GGCAGCCGGCTTGGTGCTTTAGTTTTTGTGGCAGTGGGAGAATTTTTATACAAATCCAA | 211 |
| Hec1B_5_T7      | GGCAGCCGGCTTGGTGCTTTAGTTTTTGTGGCAGTGGGAGAATTTTTATACAAATCCAA | 206 |
| LoVo_5_t7       | GGCAGCCGGCTTGGTGCTTTAGTTTTTGTGGCAGTGGGAGAATTTTTATACAAATCCAA | 207 |
| HCT116_5_T7     | GGCAGCCGGCTTGGTGCTTTAGTTTTTGTGGCAGTGGGAGAATTTTTATACAAATCCAA | 205 |
|                 | *** ****                                                    |     |

|                 |                                                              |     |
|-----------------|--------------------------------------------------------------|-----|
| LoVo_5_M13      | AAAAAACGCTCAATTGAAAAAGGTAAATGTTACTTGTTCCTCATTATATAAAAA       | 292 |
| Hec59_5_M13     | AAAAAACGCTCAATTGAAAAAGGTAAATGTTACTTGTTCAGTTTAAATTTAAAACAAT-  | 297 |
| Hec1B_5_M13     | A-AAAAACGCTCAATTGAAAAAGGTAAATGTTACTTGTTCAGTTTAAATTTAAAACAAT- | 298 |
| HCT116_5_M13    | AAAAAACGCTCAATTGAAAAAGGTAAATGTTACTTGTTCAGTTTAAATTTAAAACAAT-  | 299 |
| GRIK2_reference | AAAAAACGCTCAATTGAAAAAGGTAAATGTTACTTGTTCAGTTTAAATTTAAAACAAT-  | 262 |
| Hec59_5_T7      | AAAAAACGCTCAATTGAAAAAGGTAAATGTTACTTGTTCATTTTAAATTTAAAACAAT-  | 270 |
| Hec1B_5_T7      | A-AAAAACGCTCAATTGAAAAAGGTAAATGTTACTTGTTCAGTTTAAATTTAAAACAAT- | 264 |
| LoVo_5_t7       | AAAAAACGCTCAATTGAAAAAGGTAAATGTTACTTGTTCAGTTTAAATTTAAAACAAT-  | 266 |
| HCT116_5_T7     | AAAAAACGCTCAATTGAAAAAGGTAAATGTTACTTGTTCAGTTTAAATTTAAAACAAT-  | 264 |
|                 | * **** ** * * *                                              |     |

### Conclusion: Hec1B has MS-related deletion

### KMT2C MS locus analysis:

>KMT2C\_reference

TCATTTAGGTCTGAGTGAGCAGAAGCCTGTGAGCAAGGAGTGTCAACATTATCTTTATTCTCATCTTTT  
TTCAGTTTCACATTTGGATTCCACCTTAGAATTTGGAGACAGTACTTCCGTTTTTACCTCATTGGTAACAG  
TGGATTTTTCTGTGGTGAATGTTTATCAGAGAGAACCAGAGTTTTGTTTTCTTCTTTTTTTTTGGTT  
CAACAGATACACACTGATTATCTAACTTATCATCAATTGGAAGGTCTAGTTCCTCATTAAACATGCTTTTC  
TTATCTCCCATGTCAAGTCTGGATCTGTATATGCAATGATATCAAACCTCCTGACCTTAAGAGGTCATC  
CAGGTTGGGATCATTAGTTTCAAATTATCTAAAGTATCCAATTC

>HCT116\_KMT2C\_T7

CCAACCTGGCAGCTGAGTGAGCAGAGCCTGTGAGCAGGAGTGTCAACATTATCTTTATTCTCATCTTTT  
TTCAGTTTCACATTTGGATTCCACCTTAGAATTTGGAGACAGTACTTCCGTTTTTACCTCATTGGTAACAG



TGGATTTTTCTGTGGTGAATGTTTATCAGAGAGAACCAGAGTTTTGTTTTCTTGTTCTTTTTTTTTGGTTC  
AACAAATACCCACGGATAATCTAATTTATCACCATTTGAAAGGTCTATTTCCCATTA AACAGGCTTTTTCT  
TATCTCCAGGTCAAGTTCGGAATCTGTATATGCAAGGATTTCAAACCTCTCCGGACCTTAAAAGGTCATC  
CACCTATATGGCCACCAAATTGTCAACCTTTTTCCCGGAGGCCCGTTAAACGGGGTGATTCCCTCGGGCA  
GCCAAGGGTCCGGGGTGAATCCATGGGCTAGGAATGAGAAGAG

>HCT116\_KMT2C\_M13

TCCTTTTTATAAGAATCATATTGGGGGTAAAAGAAGGCCAGGTGAGTGAGCCGAAGCCTGTGAGCAA  
GGAGGGTCAACCTTATTTTTATTTTTATCATTTTTTTCAGTTTCACATTTGGATTCCCTTAGAATTTGGA  
GACCGTAATTCCGTTTTACCTCATTGGTAACCGGGGATTTTTTTTTGTGGGAAAGTTTATTAGAGAGAA  
CCAGAGTTTTGTTTTTTGTTCTTTTTTTTTGGTTCAACAGATACACACTGATTATCTAACTTATCATCAATT  
GGAAGGTCTAGTTCCTCATTAAACATGCTTTTTTTATCTCCCATGTCAAGTTCTGGATCGGTATATGCAAT  
GATATCAAACCTCCTGACCTAAGAGTCTCCAGCTTAGCCC

>LoVo\_KMT2C\_T7

CAGAGGAGGGCAGCTGAGTGAGCAGAGCCTGTGAGCAAGGAGTGTCAACATTATCTTTATTCTCATCAT  
TTTTTTCAGTTTCACATTTGGATTCCACCTTAGAATTTGGAGACAGTACTTCCGTTTTTACCTCATTGGTAA  
CAGTGGATTTTTCTGTGGTGAATGTTTATCAGAGAGAACCAGAGTTTTGTTTTCTTGTTCTTTTTTTTTGG  
TTCAACAGATACACACTGGTTATCTAACTTATCATCAATTGGAAGGGCTAGTTCCTCATTAAACATGCTTT  
TCTTATCTCCCATGTCAAGTTCTGGATCTGTATATGCAATGATATCAAACCTCCTGACCTTAAAAGTCA  
TCCAGCTATAGTGGCACCTAAATGTCATAACTGTTTCCAAGGGA

>LoVo\_KMT2C\_M13

TCCTTTTTAATAGGACTCACTATGGGGTGTAAAAGGACGGCCAGCTGAGTGAGCAGAAGCCTGTGAGC  
AAGGAGTGTCAACATTATCTTTATTTTCATCATTTTTTTCAGTTTCACATTTGGATTCCCTTAGAATTGG  
GAGCCAGTACTTCCGTTTTTACCTCATTGGTACCAGTGGATTTTTTTTTGTGGGGAATGTTTTTCAGAGAGA  
ACCAGAGTTTTGTTTTCTTGTTCTTTTTTTTTGGTTCAACAGATACACACTGATTATCTAACTTATCATCAA  
TTGGAAGGTCTAGTTCCTCATTAAACATGCTTTTTTTATCTCCCATGTCAAGTTCTGGATCTGTATATGCA  
ATGATATCAAACCTCCTGACCTAAGAGGTCATCCAGGCTATTCGCCCT

>Hec1B\_KMT2C\_T7

CCGGCGGCAGCTGAGTGAGCAGAGCCTGTGAGCAAGGAGTGTCAACATTATCTTTATTCTCATCATTTTT  
TTCAGTTTCACAGTTTGGATTCCACCTTAGAATTTGGAGACAGTACTTCCGTTTTTACCTCATTGGTAACA  
GTGGATTTTTCTGTGGTGAATGTTTATCAGAGAGAACCAGAGTTTTGTTTTCTTGTTCTTTTTTTTTGGT  
TCAACAAATACACACTGATTATCTAACTTATCATCAATTGGAAGGTCTATTCCTCATTAAACATGCTTTTC  
TTATCTCCAGGTCAAGTTCTGGATCTGTATATGCAATGATATCAAACCTCCTCCGACCTTAAAAGGTCATC  
CAGCTATAGTGTACCTAATTGTCAAAGTTTTTTCCGGAGA

>Hec1B\_KMT2C\_M13

TCCTTTTTATTTCGATTCACTATAGGGTGTAAAACGACGGCCAGGTGAGTGAGCAGAAGCCTGTGAGCA  
AGGAGTGTCAACATTATTTTTATTTTCATCATTTTTTTCAGTTTCACATTTGGATTCCACCTTAGAATTTGG  
AGACAGTAATTCCGTTTTTACCTCATTGGTAACAGTGGATTTTTTTTTGTGGTGAATGTTTATCAGAGAGAA  
CCAGAGTTTTGTTTTTTGTTCTTTTTTTTTGGTTCAACAGATACACACTGATTATCTAACTTATCATCAAT  
TGGAAGGTCTAGTTCCTCATTAAACATGCTTTTCTTATCTCCCATGTCAAGTTCTGGATCTGTATATGCAA  
TGATATCAAACCTCCTGACTTAAAGAGGTCATCCCATGGTAGTTGGCCCC

>Hec59\_KMT2C\_T7

CAAGTTGGCAGCTGAGTGAGCAGAGCCTGTGAGCAAGGAGTGTCAACATTATCTTTATTCTCATCATTTTT  
TTTCAGTTTCACATTTGGATTCCACCTTAGAATTTGGAGACAGTACTTCCGTTTTTACCTCATTGGTAACA  
GTGGATTTTTCTGTGGTGAATGTTTATCAGAGAGAACCAGAGTTTTGTTTTCTTGTTCTTTTTTTTTGGT

TCAACAGATACACACTGATTATCTAACTTATCATCAATTGGAAGGTCTAGTTCCTCATTAAACATGCTTTT  
CTTATCTCCCATGTCAAGTTCTGGATCTGTATATGCAATGATATCAAACCTCTCCTGACCTTAAGAGGTCAT  
CCAGCTATAGTGTACCTAAATGTCATAGCTGTTTCCGAAAG

>Hec59\_KMT2C\_M13

TTTTTAATACGACCCACTATAGGGTGTAAAACGACGGCCAGCTGAGTGAGCAGAAGCCTGTGAGCAAG  
GAGTGTCAACATTATCTTTATTCTCATCATTTTTTTTCAGTTTCACATTTGGATTCCACCTTAGAATTTGGAG  
ACAGTACTTCCGTTTTTACCTCATTGGTAACAGTGGATTTTTCTGTGGTGAATGTTTATCAGAGAGAACC  
AGAGTTTTGTTTTCTTGTTCTTTTTTTTTGGTTCAACAGATACACACTGATTATCTAACTTATCATCAATTG  
GAAGGTCTAGTTCCTCATTAAACATGCTTTTCTTATCTCCCATGTCAAGTTCTGGATCTGTATATGCAATG  
ATATCAAACCTCTCCTGACCTTAAGAGGTCATCCAGCTTAGCC

**Alignment\_result\_KMT2C\_MS\_region:**

|                 |                                                               |     |
|-----------------|---------------------------------------------------------------|-----|
| HCT116_6_T7     | GATTTTTTCTGTGGTGAATGTTTATCAGAGAGAACCAGAGTTTTGTTTTCTTGTTCCCTTT | 203 |
| Hec1B_6_T7      | GATTTTTTCTGTGGTGAATGTTTATCAGAGAGAACCAGAGTTTTGTTTTCTTGTTCCCTTT | 204 |
| LoVo_6_T7       | GATTTTTTCTGTGGTGAATGTTTATCAGAGAGAACCAGAGTTTTGTTTTCTTGTTCCCTTT | 206 |
| Hec59_6_T7      | GATTTTTTCTGTGGTGAATGTTTATCAGAGAGAACCAGAGTTTTGTTTTCTTGTTCCCTTT | 204 |
| HCT116_6_M13    | GATTTTTTTTGTGGGAAAGTTTATTAGAGAGAACCAGAGTTTTGTTTTTTTGTTCCTT-   | 236 |
| KMT2C_reference | GATTTTTTCTGTGGTGAATGTTTATCAGAGAGAACCAGAGTTTTGTTTTCTTGTTCCCTTT | 204 |
| LoVo_6_M13      | GATTTTTTTTGTGGGAAATGTTTTCAGAGAGAACCAGAGTTTTGTTTTCTTGTTCCCTT-  | 238 |
| Hec1B_6_M13     | GATTTTTTTTGTGGTGAATGTTTATCAGAGAGAACCAGAGTTTTGTTTTTTTGTTCCTTT  | 238 |
| Hec59_6_M13     | GATTTTTTCTGTGGTGAATGTTTATCAGAGAGAACCAGAGTTTTGTTTTCTTGTTCCCTTT | 235 |

\*\*\*\*\* \*\* \*\* \* \* \*\*\*\*\*

|                 |                                                              |     |
|-----------------|--------------------------------------------------------------|-----|
| HCT116_6_T7     | -TTTTTGGTTCAACAAATACCCACGGATAATCTAATTTATCACCATTTGAAAGGTCTATT | 262 |
| Hec1B_6_T7      | TTTTTGGTTCAACAAATACACACTGATTATCTAACTTATCATCAATTGGAAGGTCTATT  | 264 |
| LoVo_6_T7       | -TTTTTGGTTCAACAGATACACACTGGTTATCTAACTTATCATCAATTGGAAGGGCTAGT | 265 |
| Hec59_6_T7      | TTTTTGGTTCAACAGATACACACTGATTATCTAACTTATCATCAATTGGAAGGTCTAGT  | 264 |
| HCT116_6_M13    | TTTTTGGTTCAACAGATACACACTGATTATCTAACTTATCATCAATTGGAAGGTCTAGT  | 296 |
| KMT2C_reference | TTTTTGGTTCAACAGATACACACTGATTATCTAACTTATCATCAATTGGAAGGTCTAGT  | 264 |
| LoVo_6_M13      | TTTTTGGTTCAACAGATACACACTGATTATCTAACTTATCATCAATTGGAAGGTCTAGT  | 298 |
| Hec1B_6_M13     | TTTTTGGTTCAACAGATACACACTGATTATCTAACTTATCATCAATTGGAAGGTCTAGT  | 298 |
| Hec59_6_M13     | TTTTTGGTTCAACAGATACACACTGATTATCTAACTTATCATCAATTGGAAGGTCTAGT  | 295 |

\*\*\*\*\* \*\* \*\* \* \* \*\*\*\*\*

**Conclusion: HCT116, LoVo have MS-related deletion**

**XYLT2 MS locus analysis:**

>XYLT2\_reference

GGAAAAGCCGCAGGAGGCTGAGCTCTAGGCAGTGCTGAGGGGCCAGCCCCACCATGCCCTCTGGGGCT  
TCCAGAGCCCTTACCCCTTGCCTCTCCCACTCCAGCAAGTCTCCAGACCCACCTTCTCGCCCGGAAG  
TTCGAGTCGACTGTGAACCAGGAGGTGCTGGAAATCCTGGACTTCCACCTGTATGGCAGCTACCCCCC  
GGCAGGCCAGCCCTCAAGGCCTACTGGGAGAACACCTACGACGCGGCTGATGGCCCCAGTGGGCTCAG  
TGATGTCATGCTCACTGCTTACACAGCCTTCGCCCCCTCAGCCTGCACCATGCCGCCACTGCTGCACCCC  
CAATGGGCACCCCACTCTGCAGGTGAGACCCCTTCTGACATACAGCAGGCCCT

>HCT116\_XYLT2\_T7

ACAACCTGCAGTGTAGCGCAGAGGCTGAGCTCTGCGCAGTGCTATAGGGGCCAGCCCCACCATGCCCTCT  
GGGGCTTCCAGAGCCCTTACCCCTTGCCTCTCCCACTCCAGCAAGTCTCCAGACCCACCTTCTCGCC  
CGGAAGTTCGAGTCGACTGTGAACCAGGAGGTGCTGGAAATCCTGGACTTCCACCTGTATGGCAGCTAC  
CCCCCGGCCCGGCCCTCAGGGCCTACGGGGAAACACCTACAACCCGCCTAAGGGCCCCGTTGGG  
CTCATTGATGTCATGCTCACTGCTTACACAGCCTTCGCCCCCTCACCCGGCACCAAGGCCCCCCCTGCTGC  
ACCCCAAGGGGCACCCCACTTCTGCAGGTAAAACCCCTTCTAACATACAGCAGGCCCTATGGTGTCCACC  
TAATTTTCAAACTTTTCCGGAAGGTATCTCAACGGGAATTAACCTTTTCGCACATCTATTGTGTCCCTTC  
CATCCACTCTGGGTTTCTTCACTTCTTAGATACGGTGTGCCTTTAAACAACACTTCTCCAGCGACAA

ACCGCACGTGGGAGATTCTAATGTCTAGTCTGTACCCTCCTGATCTGGGCACTTCTGTCCCTACTAGAGA  
CCTCCAAAGATAAGCCTTCATTGAGCATGCTGGTTTGTATCTGTCTCCTCCCTGCACAGGTGTGTGCACA  
ATTCTGCTCGCTATTGTATCCCGTACTGATCTAAAATACAGAAGCCCCTATTCCGGGCGCCGAAATGGTTA  
ATTAATTCTTTGG

>HCT116\_XYLT2\_M13

CGTGGCCGTTTTCTTGAGACAACTCCATTTTTTTGAAGGTCTTTAGAAAGCAGCATGAGGCCGAGTTTT  
ATTTTTACTATACAAATGGTGGCGAAGGTGCAGAAGTTGAACAGGGGGTCCGTTTACTTCCAGTAAAA  
GAGCTAAGTGCAGTCAGCGTAGCGGTAAGCAGGTAATACTAATAAGGTATTCTCCAATGAAAATATCC  
GTCAAGTAGTCAATAATATTAATCGTATAACTTTTTATGTTGCTATACTTTATAAGACTCAATATAGGGT  
GTAAAAAGACGGCCAGTGAAAAGCCGCAGGAGGGTGAGCTTTTGGCAGTGGTGAGGGGCCAGCCCCA  
CCATGCCCTTTGGGGGTTCCAGAGCCCTTACCCTCCTTGCCTTTTCCAATCCAGCAAGTTTCCAGACCCA  
CCTTTTTTGGCCGAAATTCGAGTTGAATGTGAACCCGGAGGTGGTGAAATCCTGGAATCCACCTGTA  
TGGCAGGTACCCCCCGGCACGCCAGCCCTCAAGGCCTACTGGGAGAACACCTACGACGCGGCTGATG  
GCCCCAGTGGGCTCAGTGATGTCATGCTCACTGCTTACACAGCCTTCGCCCCCTCAGCCTGCACCATTA  
ATACAATGCTGCACCCGGCAATGGGCACCCCACTATGGCAAGTGCAGACCCCACTGCTGACATACAGCAG  
GCCCTATAACCCC

>LoVo\_XYLT2\_T7

GAGATGGCAGTGAAGCCGCAGAGGCTGAGGACTGCGCGTGCTATAGGGTCCCGCCCCTGTTGACCTCT  
GGGGCTTCCAGAGCCCTTACCCTCCTTGCCGCTCCCACTCCAGCAAGTCTCCAGACCCACCTTCTTCGCC  
CGGAAGTTCGAGTCGACTGTGAACCAGGAGGTGCTGGAAATCCTGGACTTCCACCTGTATGGCAGCTAC  
CCCCCGGCACGCCAGCCCTCAAGGCCTACTGGGAGAACACCTACAACGCGGCTGATGGCCCCAGTGG  
GCTCAGTGATGTCATGCTCACTGCTTACACAGCCTTCGCCCCCTCAGCCTGCACCATGCCGCCACTGCT  
GCACCCCAATGGGCACCCCACTCTGCAGGTGAGACCCCTTCTGACATACAGCAGGCCCTATAGTGTA  
CCTAAATGTCATAGCTGTTTCCTAA

>LoVo\_XYLT2\_M13

CCTCCTAATACGACTCACTATAGGGTGTAACGACGGCCAGTGAAAAGCCGCAGGAGGCTGAGCTCTA  
GGCAGTGCTGAGGGGCCAGCCCCACCATGCCCTCTGGGGCTTCCAGAGCCCTTACCCTCCTTGCCTCTC  
CCACTCCAGCAAGTCTCCAGACCCACCTTCTTCGCCCCGGAAGTTCGAGTCGACTGTGAACCAGGAGGTG  
CTGGAAATCCTGGACTTCCACCTGTATGGCAGTACCCCCCGGCACGCCAGCCCTCAAGGCCTACTGG  
GAGAACACCTACGACGCGGCTGATGGCCCCAGTGGGCTCAGTGATGTCATGCTCACTGCTTACACAGCC  
TTCGCCCCCTCAGCCTGCACCATTAATACGATGCTGCACTCGGCAGTAAACACCCCAACAGGCAAAAG  
CCACCCAGTCTGACATACAGCAGGCCGGGTAGCCCT

>Hec1B\_XYLT2\_T7

GCAACGGCAGTGAAGCGCAGAGGCTGAGGACTGCGCGCGCTATAGGGGCCCGCCCCTGTCGACCTCTG  
GGGCTTCAAGAGCCCTTACCCTCCTTGCCTCTCCCACTCCAGCAAGTCTCCAGACCCACCTTCTTCGCCC  
GGAAGTTCGAGTCGACTGTGAACCAGGAGGTGCTGGAAATCCTGGACTTCCACCTGTATGGCAGCTACC  
CCCCCGGCACGCCGCCCTCAAGGCCTACTGGGAGAACACCTACAACGCGGCTGATGGCCCCAGTGGGCT  
CAGTGATGTCATGCTCACTGCTTACACAGCCTTCGCCCCCTCAGCCTGCACCATGCCGCCACTGCTGCA  
CCCCAATGGGCACCCCACTCTGCAGGTGAGACCCCTTCTGACATACAGCAGGCCCTATAGTGTCACCT  
AAATGTCATACTGTTTCTGAAAGTTTTCTTTTGGGCTTGACTGGCTTTAAGCTGAAGCCTTCGGTGAAT  
TCCAGGGCACACTGGCCTTCTTCATCTCCTTAAAGGTTGGGGGTGTGTCGTACAGACAGTTCGGAGG  
ACCTAGGTACTTGGGTGAGATTCTTGGCCATGCTAAGGAGGCAGAGATAAGGCAGGCGAGGGGGAG

>Hec1B\_XYLT2\_M13

TCTCCAATACGACTCACTTTAGGGTGTAACGACGGCCAGTGAAAAGCCGCAGGAGGCTGAGCTCTAG  
GCAGTGCTGAGGGGCCAGCCCCACCATGCCCTCTGGGGCTTCCAGAGCCCTTCACCCTCCTTGCCCTCC  
CACTCCAGCAAGTCTCCAGACCCACCTTCTTCGCCCCGGAAGTTCGAGTCGACTGTGAACCAGGAGGTGC  
TGAAATCCTGGACTTCCACCTGTATGGCAGTACCCCCCGGCACGCCAGCCCTCAAGGCCTACTGGG  
AGAACACCTACGACGCGGCTGATGGCCCCAGTGGGCTCAGTGATGTCATGCTCACTGCTTACACAGCCT  
TCGCCCCGCTCAGCCTGCACCATTTAATACGATGCTGCACTAGGCAGTGGACACCCACCAGGCAAAGC  
CACCCAGTCTGACATACAGCATACCTTTAAACC

>Hec59\_XYLT2\_T7

CAGCGGCAGTGAGCCGCAGAGGCTGAGCTCTGCGCGCGCTATAGGGGCCCGCCCCACCATGCCCTCTG  
GGGCGAAAGAGCCCTTCACCCTCCTTGCCCTCCCACTCCAGCAAGTCTCCAGACCCACCTTCTTCGCCCC  
GAAGTTCGAGTCGACTGTGAACCAGGAGGTGCTGGAAATCCTGGACTTCCACCTGTACGGCAGCTACCC  
CCCCGGCACGCCAGCCCTCAAGGCCTACTGGGAGAACACCTACGACGCGGCTGATGGCCCCAGTGGGC  
TCAGTGATGTCATGCTCACTGCTTACACAGCCTTCGCCCCGCTCAGCCTGCACCATGCCGCCACTGCTGC  
ACCCCCAATGGGCACCCCACTCTGCAGGTGAGACCCCTTCTGACATACAGCAGGCCCTATAGTGTCCACC  
TAAATGTCATAGCTGTTCCGGGAATTTTTGTGGGAGGGAAAGTGAGGATGTAGGCACGAAGCAGTGT  
GTCGTTCTGCCTCTCTGACGTTGCTTGTTCCTTTAAAAGGGAGAAGTATTATGGATGAGAGACTTC  
GAAAGACAATCCACTTGGCTGAAATTAGATGGTGTGGACTGGGGCTCCTAATCTGTTGAACTTTTGTACA  
ACT

>Hec59\_XYLT2\_M13

AGAAATCTTGAACCTGGAGGGCTCGAGTGCCAATTATCTGTTAATAAACCTATTCACTCCATACTTGTCT  
ACAGAGTGAGAGTCTCTGTGAAAAGCTAAAAAGAACCAAAAGAACCTGTCCATTTCTCACTTAGATAG  
AAAAACACTCCGTGTGTCTCAGTTTTTTTTACAAGCTTCTTGAGACCGTTACAATTGTTTTAAATCACAAG  
GGGTTGGGAAAATCAGCAATCTAAAGATGGGGGATCAGAGATTCACCAAAGAGTAAAAACAAGTAT  
TCAAGGTCACCGGAACGAAAAAATTCTATTACGGCAAACCCTCCATTGAAACGACATTTTGTGCCCAAA  
CAAAAAAAAAACAAAAGAACCTGGGGAGGCAGCTTTAATACGACTCACTATAGGGTGTAACGACGG  
CCAGTGAAAAGCCGCAGGAGGCTGAGCTCTAGGCAGTGCTGAGGGGCCAGCCCCACCATGCCCTCTGG  
GGCTCCAGAGCCCTTCACCCTCCTTGCCCTCCCACTCCAGCAAGTCTCCAGACCCACCTTCTTCGCCCCG  
GAAGTTCGAGTCGACTGTGAACCCGGAGGTGCTGGAAATCCTGGACTTCCACCTGTACGGCAGCTACCC  
CCCCGGCACGCCAGCCCTCAAGGCCTACTGGGAGAACACCTACGACGCGGCTGATGGCCCCAGTGGGC  
TCAGTGATGTCATGCTCACTGCTTACACAGCCTTCGCCCCGCTCAGCCTGCACCATTTAATACGATGCTGC  
ACCCGGCAGTGGGCACCCACCAGGAAAAGAGACCCCACTGCTGACATACAGCAGCCGATAGCC

**Alignment\_result\_KMT2C\_MS\_region:**

|                 |                                                               |     |
|-----------------|---------------------------------------------------------------|-----|
| HCT116_9_T7     | GACCCACCTTCTTCGCCCGGAAGTTCGAGTCGACTGTGAACCCAGGAGGTGCTGGAAATCC | 183 |
| HCT116_9_M13    | GACCCACCTTTTTTTCGCCCGAAATTCGAGTTGAATGTGAACCCGAGGTGGTGGAAATCC  | 471 |
| Hec59_9_M13     | GACCCACCTTCTTCGCCCGGAAGTTCGAGTCGACTGTGAACCCGAGGTGCTGGAAATCC   | 597 |
| LoVo_9_M13      | GACCCACCTTCTTCGCCCGGAAGTTCGAGTCGACTGTGAACCCAGGAGGTGCTGGAAATCC | 218 |
| Hec1B_9_M13     | GACCCACCTTCTTCGCCCGGAAGTTCGAGTCGACTGTGAACCCAGGAGGTGCTGGAAATCC | 217 |
| LoVo_9_T7       | GACCCACCTTCTTCGCCCGGAAGTTCGAGTCGACTGTGAACCCAGGAGGTGCTGGAAATCC | 182 |
| Hec1B_9_T7      | GACCCACCTTCTTCGCCCGGAAGTTCGAGTCGACTGTGAACCCAGGAGGTGCTGGAAATCC | 181 |
| XYLT2_reference | GACCCACCTTCTTCGCCCGGAAGTTCGAGTCGACTGTGAACCCAGGAGGTGCTGGAAATCC | 176 |
| Hec59_9_T7      | GACCCACCTTCTTCGCCCGGAAGTTCGAGTCGACTGTGAACCCAGGAGGTGCTGGAAATCC | 180 |
|                 | ***** ** ***** ***** ** ***** ***** ***** *****               |     |
| HCT116_9_T7     | TGGACTTCCACCTGTATGGCAGCTACCCCCCGGCCCGCCCTCAGGGCTACGGGG        | 243 |
| HCT116_9_M13    | TGGAAATCCACCTGTATGGCAGGTACCCCCCGGCACGCCAGCCCTCAAGGCCTACTGGG   | 531 |
| Hec59_9_M13     | TGGACTTCCACCTGTATGGCAGCTACCCCCCGGCACGCCAGCCCTCAAGGCCTACTGGG   | 657 |
| LoVo_9_M13      | TGGACTTCCACCTGTATGGCAGCTACCCCCCGGCACGCCAGCCCTCAAGGCCTACTGGG   | 278 |
| Hec1B_9_M13     | TGGACTTCCACCTGTATGGCAGCTACCCCCCGGCACGCCAGCCCTCAAGGCCTACTGGG   | 277 |
| LoVo_9_T7       | TGGACTTCCACCTGTATGGCAGCTACCCCCCGGCACGCCAGCCCTCAAGGCCTACTGGG   | 242 |
| Hec1B_9_T7      | TGGACTTCCACCTGTATGGCAGCTACCCCCCGGCACGC-CGCCCTCAAGGCCTACTGGG   | 240 |
| XYLT2_reference | TGGACTTCCACCTGTATGGCAGCTACCCCCCGGCACGCCAGCCCTCAAGGCCTACTGGG   | 236 |
| Hec59_9_T7      | TGGACTTCCACCTGTACGGCAGCTACCCCCCGGCACGCCAGCCCTCAAGGCCTACTGGG   | 240 |
|                 | *** ***** ***** ***** * * ***** ***** **                      |     |
| HCT116_9_T7     | AAAACACCTACAACCCGCTAAGGGCCCCGTTGGGCTCATTGATGTCATGCTCACTGCTT   | 303 |
| HCT116_9_M13    | AGAACACCTACGACGCGGCTGATGGCCCCAGTGGGCTCAGTGATGTCATGCTCACTGCTT  | 591 |
| Hec59_9_M13     | AGAACACCTACGACGCGGCTGATGGCCCCAGTGGGCTCAGTGATGTCATGCTCACTGCTT  | 717 |
| LoVo_9_M13      | AGAACACCTACGACGCGGCTGATGGCCCCAGTGGGCTCAGTGATGTCATGCTCACTGCTT  | 338 |
| Hec1B_9_M13     | AGAACACCTACGACGCGGCTGATGGCCCCAGTGGGCTCAGTGATGTCATGCTCACTGCTT  | 337 |
| LoVo_9_T7       | AGAACACCTACAACGCGGCTGATGGCCCCAGTGGGCTCAGTGATGTCATGCTCACTGCTT  | 302 |
| Hec1B_9_T7      | AGAACACCTACAACGCGGCTGATGGCCCCAGTGGGCTCAGTGATGTCATGCTCACTGCTT  | 300 |
| XYLT2_reference | AGAACACCTACGACGCGGCTGATGGCCCCAGTGGGCTCAGTGATGTCATGCTCACTGCTT  | 296 |
| Hec59_9_T7      | AGAACACCTACGACGCGGCTGATGGCCCCAGTGGGCTCAGTGATGTCATGCTCACTGCTT  | 300 |
|                 | * ***** ** ** * ***** ***** ***** *****                       |     |

## Conclusion: HCT116 has MS-related deletion

### COBLL1 MS locus analysis:

>COBLL1\_reference

TCATCAGTTTTTCAACAAGGGGTTGTGGAACAGAGTGAGGCATTTTACTTAAGGGAGAAAGAGTCTGC  
TCCGGAGAAGGCAGCATATCCCTTCTGCCTCTTTATTTGTCAGTTCTTTGGAGCAGGATTAGGGGCAG  
CATGGACACTCTTGGCAGCTGCAGATGTCACATAGTGACCCGATACTCTTCTGCATCTGCAAAAAAA  
AGAGCTGGGTTTGGCCTGGGCATTTGAAGCCCGAGATTTAAATTTTGATTCCAAAATATTGTTTATTTCTT  
CCAAATTTGGTGCAAAAGGAGCTGTGCCAGTGTCTTGTCAATTTGGGAGCAGGTTTCAGAGGACTAA  
CCATGGCATCATCAGGTGAGCTCACAGAACTGGGCACTTGATGCTCTGTTCT

>LoVo\_COBLL1\_T7

ACAGCGCAATGTACAGTTTGAAGTCAGGAGGATTTAAGGACAATGATGCTAGTGTTACTTTTCTGACT  
TTTCTGGACCTGGAGATGAATACATGTTGCCATTTGAGGAGGAAATTGGCCAGCATCCATCTTGAAG  
ACATGCAGGAAGTTGTTGTGCATAAAAAAAGAGGCCTGTTTTAAGAGATTATTGGCAGAAACATGCTGT  
AAGTTATCCAGTTAGCTTTTCAATTTGAAATTTCAATAAAACACTTTTTCAGAGGAATTATTTATCTCTGCAC  
ATTTCTCTTCTTCTGCAAGTATTTTCTGGAAGGTGATCTTACACAGGATATTCTAGAGTTCTAGAGGCT  
GTGTCACCTAAATGTCATAGCTGTTTCTAAAGAA

>LoVo\_COBLL1\_M13

TTCCCTTTAATACGACTCACTATAGGGTGTAAACGACGGCCAGTGTACCAGTTTGAAGTCAGGAGGA  
TTTTAATGAAAATGATTTATTTACTTTTCTACTTTTTCAGGACCTGTAGATGAATACATGTTGCCATTTGA  
GGAGGAAATTGGCCAGCATCCATCTTGAAGACATGCAGGAAGTTGTTGTGCATAAAAAAAGAGGCC  
TGTTTTAAGAGATTATTGGCAGAAACATGCTGTAAGTTATCCAGTTAGCTTTTCAATTTGAAATTTCAATAA

AACACTTTTCAGAGGAATTATTTTTATTTGCACTCTTCTCTTTGTTTAAACAGGTATTTTAGGAAGCTGATCG  
TCAACTCAGGATATTCTAGATTTTCAGAGGGTATCCTC

>Hec1B\_COBLL1\_T7

ACCGGCGGCAGTGTACAGTTTGAGTCAGGAGATATCTATAATGTTTCATATGAAGTGTCTATTGTTCACTC  
TTTCTGACTTTTCTGGACCCGGAATGAATACATGTTGCCATTTGAGGAGGAAATTGGCCAGCATCCATC  
TCTTGAAGACATGCAGGAAGTTGTTGTGCATAAAAAAAGAGGGCCTGTTTTAAGAGATTATTGGCAGAA  
ACATGCTGTAAGTTATCCAGTTAGCTTTTCATTTGAAATTCCAATAAAACACTTTTCAGAGGAATTATTTA  
TCTCTGCACATTTCTTTCTTCTGCAAGTATTTCTGGAAGGTGATCTTCACACAGGATATTCTAGAGTTC  
TAGAGGCTGTGTCACCTAAATGTCATAGCTGTTTCCTGGGAGAA

>Hec1B\_COBLL1\_M13

TCTCCTTTAATACGATTTTTATAGGGTGTAAACGACGGCCAGTGTACCAGTTTGAAAGTCAGGAGGATT  
TTAATGAAAATGATTTATTTTACTTTTCTTACTTTTCAGGACCTGTAGATGAATACATGTTGCCATTTGAG  
GAGGAAATTGGCCAGCATCCATCTCTTGAAGACATGCAGGAAGTTGTTGTGCATAAAAAAAGAGGGCCT  
GTTTTAAGAGATTATTGGCAGAAACATGCTGTAAGTTATCCAGTTAGCTTTTCATTTGAAATTCCAATAAA  
ACACTTTTCAGAGGAATTATTTTATTTGGACTCTTCTTTGGTGTAAAGATGGCTCAGTGAACCTGATCT  
TCAACTCAGGATATTCTAGATTCCCGGCGTCTAACCCC

>Hec59\_COBLL1\_T7

CCAGAAGCCCTTAACCGGGGGGGGGCTGAAGAGTGTTTAAAGTTCAAGAGTTATTTGCCTTTTCTGACT  
TTTCAGGAAAGAAAAGGATTCTGTGGCCGTTTTAGGAGAAATTTCCAGCATCCATCTCTTGAAGACCTG  
CCAGAAGGTGTTGGGCATAAAAAAATAGGCCTGGGTTTGGAGATTTTGGCGAAAACCTGCTGGAAGTT  
ATCCAATAGCGGTTCAATTTGAAATCCAATCAAGAACTTTTCAGAGGAATTATTTATCTCTGCACATTTCTC  
TTTCTTCTGCAAGTATTTTCTGTAATGTGATCTTCACACAGGATATTATAGAGTTCTAGGGGCTGTGTCAC  
CTAAATGTCAGGGCTGTTTTAATAGT

>Hec59\_COBLL1\_M13

TCTTTTTAATACGACTCACTATAGGGTGTAAACGACGGCCAGTGTACCAGTTTGAAAGTCAGGAGGATT  
TAATGAAAATGATTTATTTTACTTTTCTTACTTTTCAGGACCTGTAGATGAATACATGTTGCCATTTGAGG  
AGGAAATTGGCCAGCATCCATCTCTTGAAGACATGCAGGAAGTTGTTGTGCATAAAAAAAGAGGCCTGT  
TTTAAGAGATTATTGGCAGAAACATGCTGTAAGTTATCCAGTTAGCTTTTCATTTGAAATTCCAATAAAAC  
ACTTTTCAGAGGAATTATCTTCTTTGCACATTTCTTTGTTCTACAAGTATTTTCAGGAAGCTGTGCGAACT  
ACAGGATTTCCAGATTCCATTTCCCA

>HCT116\_COBLL1\_T7

ACCGGGGCAGTGTACAGTTTGAGTCAGGAGATATCTTAAGGTCTATGAGGCTAGTGTTACCTTTCTGA  
CTTTTCTGGATCCGTAGATGAATACATGTTGCCATTTGAGGAGGAAATTGGCCAGCATCCATCTCTTGA  
GACATGCAGGAAGTTGTTGTGCATAAAAAAAGAGGCCTGTTTTAAGAGATTATTGGCAGAAACATGCTG  
TAAGTTATCCAGTTAGCTTTTCATTTGAAATTCCAATAAAACACTTTTCAGAGGAATTATTTATCTCTGCAC  
ATTTCTCTTTCTTCTGCAAGTATTTTCTGGAAGGTGATCTTCACACAGGATATTCTAGAGTTCTAGAGGCT  
GTGTCACCTAAATGTCATAGCTGTTTCCTAAAGA

>HCT116\_COBLL1\_M13

CTTTTTAATACGACTCACTATAGGGTGTAAACGACGGCCAGTGTACCAGTTTGAAAGTCAGGAGGATTT  
AATGAAAATGATTTATTTTACTTTTCTTACTTTTCAGGACCTGTAGATGAATACATGTTGCCATTTGAGGA  
GGAAATTGGCCAGCATCCATCTCTTGAAGACATGCAGGAAGTTGTTGTGCATAAAAAAAGAGGCCTGTT  
TTAAGAGATTATTGGCAGAAACATGCTGTAAGTTATCCAGTTAGCTTTTCATTTGAAATTCCAATAAAAC  
ACTTTTCAGAGGAATTATTTTATTAGGACTCTTCTATTTGGTGTAAACAGATGGCTCAGTGAACGCAGATC  
TGACAACTCAGGATATCTAGAGTCAGAGGGTAGCCCT

**Alignment\_result\_COBLL1\_MS\_region:**

|                  |                                                                |     |
|------------------|----------------------------------------------------------------|-----|
| COBLL1_reference | GTCACATAGTGACCCGATACTCTTCTGCATCTGCAAAAAAAAAAGAGCTGGGTTTGGCC    | 225 |
| Hec59_3_T7       | CTCTTGAAGACCTGCCAGAAGTGTGGGCATA-----AAAAAATAGGCC-TGGGTTTGG     | 179 |
| Hec1B_3_T7       | CTCTTGAAGACATGCAGGAAGTGTGTGCATA-----AAAAAAGAGGCCTGTTTTAAG      | 194 |
| LoVo_3_T7        | CTCTTGAAGACATGCAGGAAGTGTGTGCATA-----AAAA-AAGAGGCCTGTTTTAAG     | 184 |
| HCT116_3_T7      | CTCTTGAAGACATGCAGGAAGTGTGTGCATA-----AAAA-AAGAGGCCTGTTTTAAG     | 185 |
| Hec1B_3_M13      | CTCTTGAAGACATGCAGGAAGTGTGTGCATA-----AAAAAAGAGGCCTGTTTTAAG      | 218 |
| HCT116_3_M13     | CTCTTGAAGACATGCAGGAAGTGTGTGCATA-----AAAA-AAGAGGCCTGTTTTAAG     | 215 |
| LoVo_3_M13       | CTCTTGAAGACATGCAGGAAGTGTGTGCATA-----AAAA-AAGAGGCCTGTTTTAAG     | 218 |
| Hec59_3_M13      | CTCTTGAAGACATGCAGGAAGTGTGTGCATA-----AAAA-AAGAGGCCTGTTTTAAG     | 216 |
|                  | **    **    *    *    *    **    ****    **** *    *    *    * |     |

**Conclusion: LoVo, HCT116, Hec59 has MS-related deletion.**

**ZBTB20\_MS locus analysis:**

>ZBTB20\_reference

TTTTTTGTTGTTGTTTTGTTTGTTCATAAGAAAGAGAGAAAGATACTACTTATCCGTCAGACACATGCAT  
CCTCATGTGGTCGTTGAACTGCTCGATTTGGTCAAACCTTGGCTGGGCAGACGGAGCAGACGTAAGTGGT  
CCCCTCCGTGCAGGCCACCACGCCTGGGGGGCCAGCGCGGGCACCTGGGGGTGTGCCTGCAGGGGGG  
GTCCCATTGCTGGCACTGTGCAGGGCCACGTGTGCTCCAGGAGGGTCTTGTGAGAGAACTTCTTTTTG  
CAGATGTAGCACTCGTAGGACTTCTCTCCCCGGTGGAGGCGCATGTGCACGTTGAGGGAGCTCTTCTGG  
GTGAAGCGCTTGTTCAGATACTACTGGTATGCCCTCACTCCTGTGTGTGTGCAC

>HCT116\_ZBTB20\_T7

ACGGCTAGAAGTCTACTTATCCGTCAGTACACATTGCTATTCGCTCATAGTGGTCGTTGAACTGCTCAGA  
TTTGTGTCAGGCTTTGCTGGGCAGACGGAGCAGACGTAAGTGGTCCCCTCCGTGCAGGCCACCACGCCT  
GGGGGGCCAGCGCGGGCACCTGGGGGTGTGCCTGCAGGGGGGTCCCATTGCTGGCACTGTGCAGGG  
CCACGTGTGCTCCAGGAGGGTCTTGTGAGAGAACTTCTTTTTGCAGATGTAGCACTCGTAGGACTTCTC  
TCCCCGGTGGAGGCGCATGTGCACGTTGAGGGAGCTCTTCTGGGTGAAGCGCTTGTTCAGATACTACA  
CTGGTATGCCCTCACTCCTGTGTGTGCTATAGTGTACCTAAATGTCATACTTGTTCCTGAA

>HCT116\_ZBTB20\_M13

TTTAATACGACTCACTATAGGGTGTAAAACGACGAGAGAAAGATACTACTTATCCGTCAGACACATGCAT  
CCTCATGTGGTCGTTGAACTGCTCGATTTGGTCAAACCTTGGCTGGGCAGACGGAGCAGACGTAAGTGGT  
CCCCTCCGTGCAGGCCACCACGCCTGGGGGGCCAGCGCGGGCACCTGGGGGTGTGCCTGCAGGGGGG  
GTCCCATTGCTGGCACTGTGCAGGGCCACGTGTGCTCCAGGAGGGTCTTGTGAGAGAACTTCTTTTTG  
CAGATGTAGCACTCGTAGGACTTCTCTCCCCGGTGGAGGCGCATGTGCACGTTTGTGGGAGCTCTTCATG  
GGGAAGACAAATTGATCGCAGGTAATACACTGGTATGCCCTCACTCCTGGTGCCTTAGCCTG

>LoVo\_ZBTB20\_T7

ACAATAAGAGAGGTCTACTTATCCGTCAGTACACAGTTGCTATTCGCTCATAGTGGTCGTTGAACTGCT  
CGATTTGTGTCAGGCTTTGCTGGGCAGACGGAGCAGACGTAAGTGGTCCCCTCCGTGCAGGCCACCACG  
CCTGGGGGGCCAGCGCGGGCACCTGGGGGTGTGCCTGCAGGGGGGTCCCATTGCTGGCACTGTGCA  
GGGCCACGTGTGCTCCAGGAGGGTCTTGTGAGAGAACTTCTTTTTGCAGATGTAGCACTCGTAGGACT  
TCTCTCCCCGGTGGAGGCGCATGTGCACGTTGAGGGAGCTCTTCTGGGTGAAGCGCTTGTTCAGATA  
TACTGGTATGCCCTCACTCCTGTGTGTGCTATAGTGTACCTAAATGTCATAGCTGTTTCCTGGG

>LoVo\_ZBTB20\_M13

AAACCGGGACTCACTTAGGGTTAAAATGACGAGAGAAAGATAGTACTTATCCGTCAGACACATGCATCC  
TCATGTGGTCGTTGAACTGCTCGATTTGGTCAAACCTTGGCTGGGCAGACGGAGCAGACGTAAGTGGTCC  
CCTCCGTGCAGGCCACCACGCCTGGGGGGCCAGCGCGGGCACCTGGGGGTGTGCCTGCAGGGGGGGT  
CCCATTGCTGGCACTGTGCAGGGCCACGTGTGCTCCAGGAGGGTCTTGTGAGAGAACTTCTTTTTGCA

GATGTAGCACTCGTAGGACTTCTCTCCCCGGTGGAGGCGCATGTGCATTTTGAGGGAGCTTCTGGGT  
GAAGCGCTTGTTGACATACTACTGGTATGCCCTCACTCTCTGGTTGGCTATTAACC

>Hec1B\_ZBTB20\_T7

ACCACCAAAGGAGGTCTACTTATCCGTCAGTACACAGTGCTATTCGCTCATAGTGGTTCGTTGAACTGCTC  
GATTTGTTTACAGGCTTTGCTGGGCAGACGGAGCAGACGTAAGTGGTCCCCTCCGTCAGGGCCACCATGCC  
TGGGGGGCCAGCGCGGGGACCTGGGGGTGTGCCTGCAGGGGGGTCCCATTGCTGGCACTGTGCAAGG  
CCACGTGTCCCTCCCGGAAGGTCTTGTGAAAAAATCTTTTTGCAGATGTAACACTCCTAAGAATTCTCT  
CCCCGGTGGAAAGCGCATGTGCACGTTGAAGGAATCTTCTGGGTGAAACGCTTGTTGCAAATACTACAC  
TGGTATGCCCTCACTCCTGTGTGTCTATAATGGTACCTTCTTCGGGGGTGTTTACCGGCCGA

>Hec1B\_ZBTB20\_M13

TATTAGGATTCATTATAGGGTGTAAAAGGAGGAGAGAAAGATATTATTTTCCTTCAGACACATGCATCT  
TCATGTGGTCGTTGAATTGTTGGATTGGTCAAACTTTCTGGGCAGACGGAGCAGACGTAAGTGTTC  
CTTCCGTGCAGGCCACCATCCCTGGGGGGCCAGCGGGGGACCCGGGGGGTGTGCCTCCAGGGGGGTCTC  
CCATTGCTGGCACTGTGCAGGGCCACGTGTCCCTCCAGGAGGGTCTTGTGAGAGAACTTCTTTTTGCAG  
ATGTAGCACTCGTAGGACTTCTCTCCCCGGTGGAGGCGCATGTGCACGTTGAGGGAGCTTCTGGGGG  
AAGCAAATTGTCGAGATAATACTGGTATCCCTCACTCCTGTGTTGCCATAATC

>Hec59\_ZBTB20\_T7

GGAATCTTGGAGAGATCTACTTATCCGTCAGTACACATTGCTATTCGCTCATTAGTGGTCGTTAGA  
GCATCAGATTTGTGTCAAAGCATTGCTGGGCAGACGGAGCAGACGTAAGTGGTCCCCTCCGTCAGGG  
CACCACGCCTGGGGGGCCAGCGCGGGCACCTGGGGGTGTGCCTGCAGGGGGGGTCCCTTGGTGGGAC  
TGGGGCAGGGCCCCTTGCCTTCCGGAAGGGCCTGGGAAAAAATTTCTTTTTGCAAATTTACCATCTA  
AGAATTTCTCCCCCGGGGAAGGCCAGTCCCCTTTAAGGAACCTTCTCCGGGTTAAACCCTTGGTGGCA  
AATCCAACCCGGGAAGGCCCCCATCCCGGGGGGGGCAAATGCCCCCAAATGGTCAAAGTGTTCCTCC  
GGAAA

**Alignment\_result\_ZBTB20\_MS\_region:**

|                                                  |                                                              |     |
|--------------------------------------------------|--------------------------------------------------------------|-----|
| Hec59_10_T7                                      | AGCGCGGGCACCTGGGGGTGTGCCTGCAGGGGGGTCCCCTTGGTGGGACTGGGGCAGGGC | 217 |
| Hec1B_10_T7                                      | AGCGCGGGCACCTGGGGGTGTGCCTGCAGGG-GGTCCCATTGCTGGCACTGTGCAAGGC  | 207 |
| Hct116_10_T7                                     | AGCGCGGGCACCTGGGGGTGTGCCTGCAGGGGGGTCCCATTGCTGGCACTGTGCAAGGC  | 207 |
| LoVo_10_T7                                       | AGCGCGGGCACCTGGGGGTGTGCCTGCAGGGGGGTCCCATTGCTGGCACTGTGCAAGGC  | 210 |
| Hec1B_10_M13                                     | AGCGGGGGCACCCGGGGGTGTGCCTCCAG-GGGGTCCCATTGCTGGCACTGTGCAAGGC  | 229 |
| Hct116_10_M13                                    | AGCGCGGGCACCTGGGGGTGTGCCTGCAGGGGGGTCCCATTGCTGGCACTGTGCAAGGC  | 232 |
| ZBTB20_reference                                 | AGCGCGGGCACCTGGGGGTGTGCCTGCAGGGGGGTCCCATTGCTGGCACTGTGCAAGGC  | 233 |
| LoVo_10_M13                                      | AGCGCGGGCACCTGGGGGTGTGCCTGCAGGGGGGTCCCATTGCTGGCACTGTGCAAGGC  | 229 |
| *** ***** ***** ** * ** * * * * * * * ** * ** ** |                                                              |     |

**Conclusion: Hec59B and Hec1B have MS-related deletion**

**BMPR2\_MS locus analysis:**

>BMPR2\_reference

TCATAAATGTACGTTCTCAATGTGATACTTTTTTCTTTCTTTAAGCAACCTGTCACATAATAGGCGTGTGC  
CAAAAATTGGTCCTTATCCAGATTATTCTTCTCCTCATAATTGAAGACTCTATCCATCATACTGACAGC  
ATCGTGAAGAATATTTCTCTGAGCATTCTATGTCCAGCACACCTTTGACTATAGGGGAAAAAACCGAA  
ATTCAATTAATACTATGAACGACAGCAAGCAAGCTCGAATCCCCAGCCCTGAAACAAGTGTACCCAGCCT  
CTCCACCAACAACAACCACAAACACCACAGGACTCACGCCAAGTACTGGCATGACTACTATATCTGAG  
ATGCCATACCAGATGAAACAAATCTGCATACCACAAATGTTGCACAG

>HCT116\_BMPR2\_T7



CCAGCTGCACTGTCCATAAGAGGCGTGTGCCAAAATTGGTCCTTATCCAGATTATTCTTCCGCCTCATACA  
TTGAAGACTCTATCCATCATACTGACAGCATCGTGAAGAATATTTCTCTGAGCATTCTATGTCCAGCACA  
CCTTTGACTATAGGGGAAAAAACCAGAAATTTCAATTAATTTAAAGAACGCCAGCCCCAACCCAAACCC  
CCGCCCTGGAACCAAGTTGCCCCACCTCCCCCAACCCCAACCCCAACCCCAACCCCAACCCCAAGGATCCAGGCC  
AGGAATGGCCTGGCCACCAATTTCTAAAATGCCTAACCCGAATAAACCAATTTTCCAAACCAAAAAGGTG  
CCAAACTTTTGTGGCCCCAAATTTTCACTTTTTTTTCTGGGACTAAAGCGTGGCAGCTTAGATCGCAGCA  
TAGAGGCAGGTATACAGGGAACCTTAACAGAAGGGGGGGGGTGGGAGAG

>HCT116\_ Bmpr2\_M13

ATGTCCTGTGTGCAGAGAGGTAGATGTTACGCAGCATTATCTAGATACAATTGTCATGCGCTCACGACT  
ATCCAGCATTACCGCTTGCCAAGCCAGAAGGCACCATGACCTCATACATGCGTCATTGGCAGACCAT  
CTTCACGAAGCTGCCTTCATAGGGGCAGTGCTGACCACTTTTTTATTTGACCAACAATGGGGTAAAAAG  
GCGGCCCCACCTGTTAACTTATTGGGGGGGGGCAAAAATTGTCCTTATTCCGGATAATTTTTCTTCTTCT  
ACCATGAAGGATTTTTTCTTATTATGGAAGGATTGGGAAGGATTATTTCTTTGAACCTTTTAAAGTTCAAC  
AAACCTTTGAATATTGGGGAAAAAACCAGAAATTCATTAACTATGAACGACAGCAAGCACAAGCTCGA  
ATCCCCAGCCCTGAAACAAGTGTACCAGCCTCTCCACCAACACAACAACCACAAACACCACAGGACTCA  
CGCCAAGTACTGGCATGACTATTATATCTGAGATGCCATACCCAGATGAAACAAATCTGCATACCACAAA  
TGTGCACAGCTAGCCC

>LoVo\_ Bmpr2\_T7

ACGGCCTGCCACTGTCCATAATAGGCGTGTGCCAAAATTGGTCCTTATCCAGATTATTCTTCTCCTCAT  
ACATTGAAGACTCTATCCATCATACTGACAGCATCGTGAAGAATATTTCTCTGAGCATTCTATGTCCAGC  
ACACCTTTGACTATAGGGGAAAAAACCAGAAATTTCAATTAATAAAGAACGCCAGCCCCAACCCAAA  
CCCCCGCCCTGGAACCAAGTGGTCACCGCCCCCTCCCCACCCACCACCCCAACCCCAAGGATTCAG  
CCCAGTTATGGGCTGGACAACAATTTTTAAAAGGCCTAACCCGAATAAACCAATTCTCCAAACAAAAAG  
GTGGCAAACTTTTGTGGCCACCAATGTTCAAACCTTTTTTCCGGGAA

>Hec1B\_ Bmpr2\_T7

ACACAATTGCCACCTGTCACATATGATGCACAGTGCCAAATAGTTCGCGCTCACTTATTCCAGATTATTCT  
TCCGCCTCATACATTGAAGACTCTATCCATCATACTGACAGCATCGTGAAGAATATTTCTCTGAGCATTCT  
TATGTCCAGCACACCTTTGACTATAGGGGAAAAAACCAGAAATTCATTAACTATGAACGACAGCAAGC  
ACAAGCTCGAATCCCAGCCCTGAAACAAGTGTACCAGCCTCTCCACCAACACAACAACCACAAACACC  
ACAGGACTCACGCCAAGTACTGGCATGACTACTATATCTGAGATGCCATACCCAGATGAAACAAATCTG  
CATACCACAAATGTTGCACAGCTATAGTGTACCTAAATGTCATACCTGTTTTCCGAGAA

>Hec1B\_ Bmpr2\_M13

TTCCTTTCTCCCGCATCACTATAGGGTGTAACGACGGCCCAACCTGTACATAATAGGCGTGTGCC  
AAAAATTGGTCCTTATCCAGATTATTCTTCTCCTCATACATTGAAGACTCTATCCATCATACTGACAGCAT  
CGTGAAGAATATTTCTCTGAGCATTCTATGTCCAGCACACCTTTGACTATAGGGGAAAAAACCAGAAAT  
TCAATTAACTATGAACGACAGCAAGCACAAGCTCGAATCCCAGCCCTGAAACAAGTGTACCAGCCTCT  
CCACCAACACAACAACCACAAACACCACAGGACTCACGCCAAGTACTGGCATGACTTTTATATGTGAGAT  
GCCATACCCAGATGAAACAAATCTGCATACCACAAATGTGCACCACGCAATAACCCCC

>Hec59\_ Bmpr2\_T7

GGGGGGTGGCCACTGTCAATAAGAGGCGTGTGCCAAAATTGGTCCTTATCCAGATTATTCTTCTCCTCCTC  
ATACATTGAAGACTCTATCCATCATACTGACAGCATCGTGAAGAATATTTCTCTGAGCATTCTATGTCCA  
GCACACCTTTGACTATAGGGGAAAAAACCAGAAATTCATTAACTATGAACGACAGCAAGCACAAGCTC  
GAATCCCAGCCCTGAAACAAGTGTACCAGCCTCTCCACCAACACAACAACCACAAACACCACAGGACT

CACGCCAAGTACTGGCATGACTACTATATCTGAGATGCCATACCCAGATGAAACAAATCTGCATACCACA  
AATGTTGCACAGCTATAGTGTACCTAAATGTCATACCTGTTTTCTAAGA

>Hec59\_BMP2\_M13

CACGCCAAGAGGAACCCGCCAGGGGTCGACCAAGTGGGGATGGTCCCCTGCTGGCAGAGAGGGCAG  
CAGGGGGCCAGCAGCCCTCCGCAAGCACGTGTCATCAACCAAGACTCATCTGCAACGACCTGCTA  
TTCAAGTCCAGAAACGCACCCCCACCTCATATTTGGTCTCTCGCGCACAGCCCATTACAGGAAGCTGCC  
CCTCCGTGCAGCGAAATCTTTTTTAATACGACTCACTATAGGGTGAAAACGACGGCCCAACCTGTCA  
CATAATAGGCGTGTGCCAAAAATTGGTCCTTATCCAGATTATTCTTCTCCTCATACATTGAAGACTCTAT  
CCATCATACTGACAGCATCGTGAAGAATATTTCTCTGAGCATTCTATGTCCAGCACACCTTTGACTATAG  
GGGAAAAAACCGAAATTCAATTAACCTATGAACGACAGCAAGCACAAGCTCGAATCCCAGCCCTGAA  
CAAGTGTACCAGCCTCTCCACCAACACAACAACCACAACACCACAGGACTCACGCCAAGTACTGGCAT  
GACTACTATATCTGAGATGCCATACCCAGATGAAACAAATCTGCATACCACAAATGTGCACAGGCTTTAA  
CCT

### Alignment\_result\_BMP2\_MS\_region:

|                |                                                              |     |
|----------------|--------------------------------------------------------------|-----|
| HCT116_11_T7   | AGCATCGTGAAGAATATTTCTCTGAGCATTCTATGTCCAGCACACCTTTGACTATAGGG  | 157 |
| LoVo_11_T7     | AGCATCGTGAAGAATATTTCTCTGAGCATTCTATGTCCAGCACACCTTTGACTATAGGG  | 160 |
| HCT116_11_M13  | AGGATTTGGGAAGGATTATTTCTTTGAACCTTTAAGTTCAACAAACCTTTGAATATTGGG | 370 |
| Hec1B_11_T7    | AGCATCGTGAAGAATATTTCTCTGAGCATTCTATGTCCAGCACACCTTTGACTATAGGG  | 170 |
| Hec59_11_T7    | AGCATCGTGAAGAATATTTCTCTGAGCATTCTATGTCCAGCACACCTTTGACTATAGGG  | 161 |
| BMP2_reference | AGCATCGTGAAGAATATTTCTCTGAGCATTCTATGTCCAGCACACCTTTGACTATAGGG  | 200 |
| Hec1B_11_M13   | AGCATCGTGAAGAATATTTCTCTGAGCATTCTATGTCCAGCACACCTTTGACTATAGGG  | 197 |
| Hec59_11_M13   | AGCATCGTGAAGAATATTTCTCTGAGCATTCTATGTCCAGCACACCTTTGACTATAGGG  | 420 |
|                | ** * * * ** * ** * ** * ** * ** * ** * ** *                  |     |

|                |                                                              |     |
|----------------|--------------------------------------------------------------|-----|
| HCT116_11_T7   | GAAAAAACCGAAATTTCAATTAATTTAAAGAACGCCAGCCCCAACCCAAACCCCGCC    | 217 |
| LoVo_11_T7     | GAAAAAACCGAAATTTCAATTAATTTAAAGAACGCCAGCCCCAACCCAAACCCCGCC    | 220 |
| HCT116_11_M13  | GAAAAAACCGAAATTTCAATTAACCTATGAACGACAGCAAGCACAAGCTCGAATCCCAGC | 430 |
| Hec1B_11_T7    | GAAAAAACCGAAATTTCAATTAACCTATGAACGACAGCAAGCACAAGCTCGAATCCCAGC | 230 |
| Hec59_11_T7    | GAAAAAACCGAAATTTCAATTAACCTATGAACGACAGCAAGCACAAGCTCGAATCCCAGC | 221 |
| BMP2_reference | GAAAAAACCGAAATTTCAATTAACCTATGAACGACAGCAAGCACAAGCTCGAATCCCAGC | 260 |
| Hec1B_11_M13   | GAAAAAACCGAAATTTCAATTAACCTATGAACGACAGCAAGCACAAGCTCGAATCCCAGC | 257 |
| Hec59_11_M13   | GAAAAAACCGAAATTTCAATTAACCTATGAACGACAGCAAGCACAAGCTCGAATCCCAGC | 480 |
|                | ***** * ** **** * ** * ** * ** * ** * ** *                   |     |

**Conclusion: HCT116 and LoVo have MS-related deletions**

### CCDC168\_MS locus analysis:

>CCDC168\_reference

GTAATGTCAGCTATGAAAAACGGTAGTAAGGGACCCCGAGAGCGACCCCAACAACCTTTTGGAGGAACT  
CCATATATTTCAAGAATTGAAATCTTTGCCACTAGGGGAATTCTGAAGTTTCTTTTCTTAAGGTTTTCAG  
GGGAATAGTCCAGCGAATGGTTTTGGGTATAACCTCCAGTGAGTCTGCCGGTACACAGGCCAAAAAAA  
AAGGGCCGTTTTTTTTTTTTCTTTTCAAGAATAGAAGTTGATATCGTCATGATGAGTTTTGATGCTGATTAT  
GTTTGCTTTGGAAACAATCCAATCTTTTCTGACTCATAATCATACACTCTTCTTTTCTGTCCAGTTTCCCTT  
GCTGTGTGTACAACCTGTAATCGTGGTCCCAATGACTGCTGTTCTTCTTAA

>HCT116\_CCDC168\_T7

ACAGTTAGTACAGCTATGATACGGTAGTAAGGGACCCCGAGAGCGACCCCAACAACCTTTTGGAGGAACT  
CCATATATTTCAAGAAGTTGAAATCTTTGCCACTAGGGGAATTCTGAAGTTTCTTTTCTTAAGGTTTTCAG  
GGGAATAGTCCAGCGAATGGTTTTGGGTATAACCTCCAGTGAGTCTGCCGGTACACAGGCCAAAAAAA  
AGGGGCGTTTTTTTTTTTTTTTTTCAAATAAAAATTATATCTCCTCGTGAAGAGTTGAGACGCATATTTGTG  
TTTGTGTTTTGAACTCCCTCTTTTGAACACTCAAACACACTCTTCTCTTTCTCTCGTTTTCCCTTTG

GTGTGTGCAACTGTGTACTCGGGCCCCCTGAGAGCGGCGCTATTGTGTCCCAATGTGTCAATGTTTTTC  
CAGGAAAGA

>HCT116\_ CCDC168\_M13

CTTTTTTTAATGAGACACAATAGGGGGTAAAAAGAGTAAAGTGTGATCTGAAAAAGGTGTTATAGGG  
GCCCCAGAGAGAGCCCCAAAAATTTGGGGGAAATCTCCATATTTACAAAAACGAAATATTTGCCCCA  
AGGGGAAATTTGAAAAATTTTTCTCTAAAGGGTCTCGGGGGGTATTCCCCAGAAAGGGGTTGGGGATA  
ACACCCACAGAGTGTGCCCTACACACGCAAAAAAAAAGGGCCGTTTTGTTTTCTTTCAGAATAGAAG  
TTGATATCGTCATGATGAGGTTTTGATGCTGATTTATGTTTGCTTTGGAAACAATCCAATCTTCTGACTC  
ATAATCATACTCTCTTCTTCTGTACGTTTCCCTTGCTGTGTGTACAACCTGTAATCGTGGTCCCAATGA  
CTGCGCTTAGCCC

>LoVo\_ CCDC168\_T7

CCAAGTATATGTCAGCTATGAAACGGTAGTAAGGGACCCCGAGAGCGACCCCACTTTTTGGAGGAA  
CTCCATATATCCAAGAAGTTGAAATCTTGGCCACTAGGGGAATTCTGAAGTTTCTTTCCCTAAGGTTTC  
AGGGGGAATAGTCCAGCGAATGGTTTTGGGTATAACCTCCAGTGAGTCTGCCGGTACACAGGCAAAAA  
AAAGGGCCGTTTTGTTTTCTTTCAGAATAGAAGTTGATATCGTCATGATGAGGTTTTGATGCTGATTTA  
TGTTTGCTTTGGAAACAATCCAATCTTCTGACTCATAATCATACTCTCTTCTTCTGTACGTTTCCCTT  
TGCTGTGTGTACAACCTGTAATCGTGGTCCCAATGACTGCTGCTATAGTGTACCTAAATGTCATAGCTGT  
TTCCTAAAGG

>LoVo\_ CCDC168\_M13

TCTTTTTAATACGACTCACTATAGGGTGTAAAACGAGTAATGTCAGCTATGAAAAACGGTAGTAAGGG  
ACCCCGAGAGCGACCCCACTTTTTGGAGGAACTCCATATATCCAAGAAGTTGAAATCTTTGCCAC  
TAGGGGAATTCTGAAGTTTCTTTCCCTAAGGTTTCAGGGGGAATAGTCCAGCGAATGGTTTTGGGTATA  
ACCTCCAGTGAGTCTGCCGGTACACAGGCAAAAAAAAAGGGCCGTTTTGTTTTCTTTCAGAATAGAAGT  
TGATATCGTCATGATGAGGTTTTGATGCTGATTTATGTTTGCTTTGGAAACAATCCAATCTTCTGACTCA  
TAATCATACTCTCTTCTTCTGTACGTTTCCCTTGCTGTGTGTACAACCTGTAATCGTGTCCCAATGACG  
CGGCTTTTTCCCCC

>Hec1B\_ CCDC168\_T7

ACAATTTAGTCACTATGAAACGGTAGTAAGGGACCCCGAGAGCGACCCCACTTTTTGGAGGAAAC  
TCCATATATCCAAGAAGTTGAAATCTTTGCCACTAGGGGAATTCTGAAGTTTCTTTCCCTAAGGTTTCA  
GGGGGAATAGTCCAGCGAATGGTTTTGGGTATAACCTCCAGTGAGTCTGCCGGTACACAGGCAAAAA  
AAAGGGCCGTTTTGTTTTCTTTCAGAATAGAAGTTGATATCGTCATGATGAGGTTTTGATGCTGATTTA  
TGTTTGCTTTGGAAACAATCCAATCTTCTGACTCATAATCATACTCTCTTCTTCTGTACGTTTCCCTT  
TGCTGTGTGTACAACCTGTAATCGTGGTCCCAATGACTGCTGCTATAGTGTACCTAAATGTCATAGATGT  
TTCCGAAAGG

>Hec1B\_ CCDC168\_M13

TCTTTTTTATACGACTTACTATAGGGTGTAAAACGAGTAATGTCAGCTATGAAAAACGGTAGTAAGGGA  
CCCCGAGAGCGACCCCACTTTTTGGAGGAACTCCATATATCCAAGAAGTTGAAATCTTTGCCACT  
AGGGGAATTCTGAAGTTTCTTTCCCTAAGGTTTCAGGGGGAATAGTCCAGCGAATGGTTTTGGGTATA  
ACCTCCAGTGAGTCTGCCGGTACACAGGCAAAAAAAAAGGGCCGTTTTGTTTTCTTTCAGAATAGAAG  
TTGATATCGTCATGATGAGGTTTTGATGCTGATTTATGTTTGCTTTGGAAACAATCCAATCTTCTGACTC  
ATAATCATACTCTCTTCTTCTGTACGTTTCCCTTGCTGTGTGTACAACCTGTAATCGTGGTCCCAAGACT  
GCCGCTTCAAGCCC

>Hec59\_ CCDC168\_T7

AGGATATAGGGTGGCCTTTGTGAACGGTAGGTAAGGGACCCCGAGAGCGATCCCAACAACCTTATAGA  
AGAACTCCATATATACAAAAACATAAAATCTTTGCCACTAGGGGAATTCTGAAGTTTCATTTCTTAAG  
GTTTCAGGGTGAATAGTCCAACGAATGGTTTTGGGTATAACCTCCAGTGAGTCTGCCGGTACACAGGCT  
AAAAAAAAGGGCCGGTTTTGTTTCCTTTGAAATAAAAGTGGAATCGTCTTCTAAAGTTTAAAGGGGA  
ATTTATTTGTGCTCCGAAAAATCAATATTTTTACACATGGTCAAACTCCTCGTTTTACAGGCCACTTT  
TCCCTCAGCTGGCCGGGGTTTTACATTCTACCTGGTTGGAAGTAAAGAATAAAA

>Hec59\_CCDC168\_M13

TTCTTTTTATAAGACCCACTATAGGGTGTAAAACGAGTAAAGTTAGGTTTGAAAAACGGTAGTAAGGG  
ACCCCGAGAGGGACCCCAACAATTTTTGGAGGAAATCCATATATTTCCAGAACTTGAAATTTTTGCCCC  
TAGGGGAATTTGAAGTTTTTTTTCTTAAGTTTCAGGGGAATAGTCCAGCGAATGGTTTTGGGTATA  
ACCTCCCGTGAGTTTGCCGGTACACCGGCAAAAAAAAAGGGCCGGTTTTGTTTTCTTTCAGAATAGAAGT  
TGATATCGTCATGATGAGGTTTTGATGCTGATTTATGTTTGCTTTGGAAACAATCCAATCTTCTGACTCA  
TAATCATACACTCTCTTCTTCTGTCACGTTTCCCTTGCTGTGTGTACAATCGTGTCCTCAAGAC  
GGTGCCAATGCCCC

**Alignment\_result\_CCDC168\_MS\_region:**

|                   |                                                                           |     |
|-------------------|---------------------------------------------------------------------------|-----|
| HCT116_12_M13     | GGGTATTCGCCAGAAGGGTTGGGGATAACACCCACAGAGTGTGCCCTACACAGGCAA                 | 239 |
| CCDC168_reference | GAATAGTCCAGCGAATGGTTTTGGGTATAACCTCCAGTGAGTCTGCCGGTACACAGGCAA              | 203 |
| LoVo_12_T7        | GAATAGTCCAGCGAATGGTTTTGGGTATAACCTCCAGTGAGTCTGCCGGTACACAGGCAA              | 205 |
| Hec1B_12_T7       | GAATAGTCCAGCGAATGGTTTTGGGTATAACCTCCAGTGAGTCTGCCGGTACACAGGCAA              | 204 |
| LoVo_12_M13       | GAATAGTCCAGCGAATGGTTTTGGGTATAACCTCCAGTGAGTCTGCCGGTACACAGGCAA              | 240 |
| Hec1B_12_M13      | GAATAGTCCAGCGAATGGTTTTGGGTATAACCTCCAGTGAGTCTGCCGGTACACAGGCAA              | 240 |
| Hec59_12_M13      | GAATAGTCCAGCGAATGGTTTTGGGTATAACCTCCCGTGAGTTGCCGGTACACCGGCAA               | 240 |
|                   | * ** *** ** * * * * * * * * * * * * * * * * * * * * * * * * * * * * * * * |     |
| HCT116_12_M13     | AAAAAAGGGCCGGTTTTGTTTTCTTTCAGAATAGAAGTTGATATCGTCATGATGAGGTT               | 299 |
| CCDC168_reference | AAAAAAGGGCCGGTTTTGTTTTCTTTCAGAATAGAAGTTGATATCGTCATGATGAGGTT               | 263 |
| LoVo_12_T7        | AAAA-AAGGGCCGGTTTTGTTTTCTTTCAGAATAGAAGTTGATATCGTCATGATGAGGTT              | 264 |
| Hec1B_12_T7       | AAAAAAGGGCCGGTTTTGTTTTCTTTCAGAATAGAAGTTGATATCGTCATGATGAGGTT               | 264 |
| LoVo_12_M13       | AAAA-AAGGGCCGGTTTTGTTTTCTTTCAGAATAGAAGTTGATATCGTCATGATGAGGTT              | 299 |
| Hec1B_12_M13      | AAAAAAGGGCCGGTTTTGTTTTCTTTCAGAATAGAAGTTGATATCGTCATGATGAGGTT               | 300 |
| Hec59_12_M13      | AAAAAAGGGCCGGTTTTGTTTTCTTTCAGAATAGAAGTTGATATCGTCATGATGAGGTT               | 300 |
|                   | **** * * * * * * * * * * * * * * * * * * * * * * * * * * * * * * *        |     |
| Hec59_12_T7       | GAATAGTCCAACGAATGGTTTTGGGTATAACCTCCAGTGAGTCTGCCGGTACACAGGCTA              | 208 |
| HCT116_12_T7      | GAATAGTCCAGCGAATGGTTTTGGGTATAACCTCCAGTGAGTCTGCCGGTACACAGGCAA              | 203 |
| HCT116_12_M13     | GGGTATTCGCCAGAAGGGTTGGGGATAACACCCACAGAGTGTGCCCTACACAGGCAA                 | 239 |
| CCDC168_reference | GAATAGTCCAGCGAATGGTTTTGGGTATAACCTCCAGTGAGTCTGCCGGTACACAGGCAA              | 203 |
| LoVo_12_T7        | GAATAGTCCAGCGAATGGTTTTGGGTATAACCTCCAGTGAGTCTGCCGGTACACAGGCAA              | 205 |
| Hec1B_12_T7       | GAATAGTCCAGCGAATGGTTTTGGGTATAACCTCCAGTGAGTCTGCCGGTACACAGGCAA              | 204 |
| LoVo_12_M13       | GAATAGTCCAGCGAATGGTTTTGGGTATAACCTCCAGTGAGTCTGCCGGTACACAGGCAA              | 240 |
| Hec1B_12_M13      | GAATAGTCCAGCGAATGGTTTTGGGTATAACCTCCAGTGAGTCTGCCGGTACACAGGCAA              | 240 |
| Hec59_12_M13      | GAATAGTCCAGCGAATGGTTTTGGGTATAACCTCCCGTGAGTTGCCGGTACACCGGCAA               | 240 |
|                   | * ** *** ** * * * * * * * * * * * * * * * * * * * * * * * * * * * * * * * |     |
| Hec59_12_T7       | AAAAAAGGGCCGGTTTTGTTTCCTTTGAAATAAAAGTGGAATCGTCTTCTAAAGTT                  | 268 |
| HCT116_12_T7      | AAAAAAGGGCCGGTTTTTTTTTTTTTTTTCAAAATAAAATTATATCTCCTCGTGAAGAGGTT            | 263 |
| HCT116_12_M13     | AAAAAAGGGCCGGTTTTGTTTCCTTTCAGAATAGAAGTTGATATCGTCATGATGAGGTT               | 299 |
| CCDC168_reference | AAAAAAGGGCCGGTTTTGTTTTCTTTCAGAATAGAAGTTGATATCGTCATGATGAGGTT               | 263 |
| LoVo_12_T7        | AAAA-AAGGGCCGGTTTTGTTTTCTTTCAGAATAGAAGTTGATATCGTCATGATGAGGTT              | 264 |
| Hec1B_12_T7       | AAAAAAGGGCCGGTTTTGTTTCCTTTCAGAATAGAAGTTGATATCGTCATGATGAGGTT               | 264 |
| LoVo_12_M13       | AAAA-AAGGGCCGGTTTTGTTTTCTTTCAGAATAGAAGTTGATATCGTCATGATGAGGTT              | 299 |
| Hec1B_12_M13      | AAAAAAGGGCCGGTTTTGTTTTCTTTCAGAATAGAAGTTGATATCGTCATGATGAGGTT               | 300 |
| Hec59_12_M13      | AAAAAAGGGCCGGTTTTGTTTTCTTTCAGAATAGAAGTTGATATCGTCATGATGAGGTT               | 300 |
|                   | **** * * * * * * * * * * * * * * * * * * * * * * * * * * * * * * *        |     |

**Conclusion: indel in HCT116, LoVo have MS-related deletions**

**EIF2B3\_MS locus analysis:**

>EIF2B3\_reference

ACATTAAAGAATCTAATCAATAGTTCTAAGCATTTTCCATTCAGGGACTGTGTCTTATTTGACTTTATGTC  
ATCAACTCCTAGCACAGAATCTGTGATGTATAGTAGATTCTTAATAAATGTTTTTTCAGGGAAAGCATGA  
GTGAGAATAATAATTACGAAAACCTCAACAAACAAAACAACTCCAATCTTCCTTACCTGCTTTTTTTTTCC  
CCTTTTGACCGGGAACAGGTTCTATGCTATCTTGGCCTTTTCTCATCAACATAGCAAGTGATGCATCATAA  
GCTCTAAACAGGTCCACAACCTCATGTAAGGCAACGTCTGTTATCAGATCACAGCTCAGCACCAGCACAT  
CTGTCTGTAAATGGAGATGGGAAAAGTCAATATCATAAAGGACAATG

>HCT116\_ EIF2B3\_T7

GCGGACTGCATCACTCCTAGCACAGAATCTGTGATGTATAGTAGATTCTTAATAAATGTTTTTTCAGGGA  
AAGCATGAGTGAGAATAATAATTACGAAAACCTCAACAAACAAAACAACTCCAATCTTCCTTACCTGCTT  
TTTTTCCCCTTTTAAACCGGAAACAGGTCCAATCCTTTTTGGCCCTTTTCCCACCACCTAACCAAGTGGAGG  
CACCAAAACCCCTAACCGGGTCCCAACCCCAGGTAAGGCACCTCCGGTAATCAAATCAAACCTAACCCAC  
CACCCCTCCTTTCGTTAAATGGAAAATGGAAAATTCATAATAAAAAGGAACATTGGCCCCCAAATTTTC  
AACTTTTTTCCGGGAAAA

>HCT116\_ EIF2B3\_M13

TTTTTTATTTGGCTCCACATTGGGGGGAAAAAGGCGGCCCTTAAATTCTTGCCCCGGATTTTTGAAGG  
TTTGAGGTTTTTAAAAAGGTTTTCCGGGAAAGCCTGGAGGGGGATTATAAATTAGGAAAATTAAC  
CAACAAAACCAAATTCCATTTTCTTACCTGGTTTTTTTTTCCCCTTTTGACCGGGAACAGGTTCTATGCTA  
TCTTGGCCTTTTCTCATCAACATAGCAAGTGATGCATCATAAGCTCTAACAGGTCCACAACCTCATGTAA  
GGCAACGTCTGTTATCAGATCACAGCTCAGCACCAGCACATCTGTCTGTAAATGGAGATGGAAAAGTC  
AATATCATAATGACCATCCC

>LoVo\_ EIF2B3\_T7

ACGGCCCCGCCAATCAACTCCTAGCACAGAATCTGTGATGTATAGTAGATTCTTAATAAATGTTTTTCA  
GGGAAAGCATGAGTGAGAATAATAATTACGAAAACCTCAACAAACAAAACAACTCCAATCTTCCTTACC  
TGCTTTTTTTTTCCCCTTTTGACCGGGAACAGGTTCTATGCTATCTTGGCCTTTTCTCATCAACATAGCAAG  
TGATGCATCATAAGCTCTAACAGGTCCACAACCTCATGTAAGGCAACGTCTGTTATCAGATCACAGCTC  
AGCACCAGCACATCTGTCTGTAAATGGAGATGGGAAAAGTCAATATCATAAAGGACAATTGTCACCTA  
AATGTCATAGCTGTTTCCTGGGAAA

>LoVo\_ EIF2B3\_M13

TTTCTTTATACGACTCACTATAGGGTGTAAAACGACGGCCCATCAACTCCTAGCACAGAATCTGTGATGT  
ATAGTAGATTCTTAATAAATGTTTTTTCAGGGAAAGCATGAGTGAGAATAATAATTACGAAAACCTCAACA  
AACAAAACAACTCCAATCTTCCTTACCTGCTTTTTTTTTCCCCTTTTGACCGGGAACAGGTTCTATGCTAT  
CTTGGCCTTTTCTCATCAACATAGCAAGTGATGCATCATAAGCTCTAACAGGTCCACAACCTCATGTAA  
GGCAACGTCTGTTATCAGATCACAGCTCAGCACCAGCACATCTGTCTGTTTAAATGGAGATGGAAAAGT  
CAATATCCAAAAGGGACCCCTACCCCC

>Hec1B\_ EIF2B3\_T7

ACCCAGCGGGCATCACTCCTAGCACAGATCTGTGATAGTATAGTAGATTCTTAATAAATGTTTTTTCAGG  
GAAAGCATGAGTGAGAATAATAATGACGAAAACCTCAACAAACAAAACAACTCCAATCTTCCTTACCTG  
CTTTTTTTTTCCCCTTTTGACCGGGAACAGGTTCTATGCTATCTTGGCCTTTTCTCATCAACATAGCAGGTG  
ATGCATCAAAGCTCTAACAGGTCCACAACCTCAGGTAAGGCAACGTCTGTTATCAAATCACAGCTCA  
CCACCAGCACATCTTCTGTAAATGGAAAAGTCAATATCATAAAGGACAATTGTCACCTAAA  
TGTCAAAGCTGTTTCCGGGGAAA

>Hec1B\_ EIF2B3\_M13

TTTTTTTTATATTTTTTCACTATAGGGTGTAACGACGGCCCATCAACTCCTAGCACAGAATTTGTGAAG  
TATAGTAGATTTTTAATAAATGTTTTTTCAGGGAAAGCCTGAGTGAGAATAATAATTACGAAAACCTCAAC  
AAACAAAACAACTCCAATTTTCTTACCTGCTTTTTTTTTCCCTTTTGACCGGGAACAGGTTCTATGCTA  
TCTTGGCCTTTTCTCATCAACATAGCAAGTGATGCATCATAAGCTCTAACAGGTCCACAACCTCATGTAA  
GGCAACGTCTGTTATCAGATCACAGCTCAGCACCAGCACATCTGTCTGTTAAATGGAGATGGAAAAGT  
CAATTCATAAAGGACCTATTCT

>Hec59\_EIF2B3\_T7

AGGCGAGTCGAAGACCCTAGCAAGAGCTGGTGATGTATAGTAGATTCTTAATAAATGTTTTTTCAGGGA  
AAGCATCGAGTGAGAATAATAATTACGAAAACCTCAACAAAACAAAACAACTCCAATCTTCTTACCTGCT  
TTTTTTTTCCCTTTTGACCGGGAACAGGTTCTATGCTATCTTGGCCTTTTCTCATCAACATAGCAAGTGAT  
GCATCATAAGCTCTAACAGGTCCACAACCTCATGTAAGGCAACGTCTGTTATCAGATCACAGCTCAGCA  
CCAGCACATCTGTCTGTTAAATGGAGATGGGAAAAGTCAATATCATAAAGGACAATTGTCACCTAAATG  
TCATAGCTGTTTCTGAAGAAA

>Hec59\_EIF2B3\_M13

TTTTTAATACGACTCACTATAGGGTGTAACGACGGCCCATCAACTCCTAGCACAGAATCTGTGATGT  
ATAGTAGATTCTTAATAAATGTTTTTTCAGGGAAAGCATGAGTGAGAATAATAATTACGAAAACCTCAACA  
AACAAAACAACTCCAATCTTCTTACCTGCTTTTTTTTTCCCTTTTGACCGGGAACAGGTTCTATGCTAT  
CTTGGCCTTTTCTCATCAACATAGCAAGTGATGCATCATAAGCTCTAACAGGTCCACAACCTCATGTAA  
GGCAACGTCTGTTATCAGATCACAGCTCAGCACCAGCACATCTGTCTGTTAAATGGAGATGGAAAAGTC  
AAATATCCAAAAAAGG

**Alignment\_result\_EIF2B3\_MS\_region:**

|                  |                                                             |     |
|------------------|-------------------------------------------------------------|-----|
| HCT116_13_T7     | AACTCCAATCTTCTTACCTGCTTTTTTTTTCCCTTTTAAACCGGAACAGGTCCAATCC  | 176 |
| HCT116_13_M13    | AAATTCATTTTTCTTACCTGGTTTTTTTTTCCCTTTTGACCGGGAACAGGTTCTATGC  | 209 |
| Hec59_13_T7      | AACTCCAATCTTCTTACCTGCTTTTTTTTTCCCTTTTGACCGGGAACAGGTTCTATGC  | 176 |
| LoVo_13_T7       | AACTCCAATCTTCTTACCTGCTTTTTTTTTCCCTTTTGACCGGGAACAGGTTCTATGC  | 180 |
| Hec1B_13_T7      | AACTCCAATCTTCTTACCTGCTTTTTTTTTCCCTTTTGACCGGGAACAGGTTCTATGC  | 178 |
| EIF2B3_reference | AACTCCAATCTTCTTACCTGCTTTTTTTTTCCCTTTTGACCGGGAACAGGTTCTATGC  | 239 |
| Hec1B_13_M13     | AACTCCAATTTTTCTTACCTGCTTTTTTTTTCCCTTTTGACCGGGAACAGGTTCTATGC | 211 |
| LoVo_13_M13      | AACTCCAATCTTCTTACCTGCTTTTTTTTTCCCTTTTGACCGGGAACAGGTTCTATGC  | 209 |
| Hec59_13_M13     | AACTCCAATCTTCTTACCTGCTTTTTTTTTCCCTTTTGACCGGGAACAGGTTCTATGC  | 209 |

\*\* \* \* \*\* \*\*\*\*\* \*\*\*\*\* \*\*\* \*\*\*\* \*\*\*\*\* \*\*\*\*\* \* \* \* \*

**Conclusion: MS-related deletion in HCT116**

**SLAMF1\_MS locus analysis:**

>SLAMF1\_reference

AACACTGACGTTTAGTGACTTTAGGAGAACTCTTGTTCTTGACTCCTGTTCCCTACCTTCTCTGCTCTGG  
ATGGAAAACGTGAATGTCCAACAGGCAAGGTAGACTGGCCAGGAATACTCTAGGAAACATGACAGGT  
TCATCTCAAACAAAATATAGAACTTACACCTGGTTTCTGGACTTGGGCATAGATCGTAAGGCTTTTTTTTT  
CCACTGTTGTCTGGTAATGGTTCGTTTTACCTGGTGAAAAGAAACCATAATGTTATCTCCCTCTGGTCCC  
CAGCAGGAGCTCCTTACTCAGACCTGGTCTTACTGTCCTTGCATACCCACTTCCCAAGGGCACAATG  
GAAACAAAGCCCTGAGTCCCAGCCCCCTGCACATTTGTCATATTGTCT

>HCT116\_SLAMF1\_T7

ACAGCTGCATGACGTTTAGTGACTTTAGGAGACTCTTGTTCTTGACTCCGTTCCCTACCTTCTCTGCTCT  
GGATGGAAAACGTGAATGTCCAAGAGGCAAGGTAGACTGGCCAGGAATACTCTAGGAAACATGACAG  
GTTTCATCTCAAACAAAATATAGAACTTACACCTGGTTTCTGGACTTGGGCATAGATCGTAAGGCTTTTTTT  
TCCCTGGTTGTCGGGAAAGGGTTCTTTTTACCGGGGAAAAAAAACCATAAGGGTTATCTCCCTCTGGT

CCCCACCAGAACCTCCTTACTCAAACCGGGCCTTTACGGTCCTTTGCATACCCCCTTTCCCAAGGGCACA  
AGGAAAACAAACCCCGGCTATATTGTCACCAAATTGTCAAAGTTTTTTCCGGAAGA

>HCT116\_SLAMF1\_M13

TTTTTTTATTAGAATCCCCTTTGGGTTTAAAAGGCGGCCCCACGACGTTTAGGGAATTTAGGGGAAATT  
TTGTTTTTGAATCCTGTTCCCTACCTTTCTTTGGTTTGGGAGGAAAACCTGTGAAAGTTCAACCGGCAAGG  
TTGGATGGCCCGGAATAATTTTGAAACCTGACCGGTTTATTTCAAACCAAAAATAGAAATTACCCCTGG  
TTTTTGAATTGGGCATAGATTGTAAGGGTTTTTTTTTCCACTGTTGTCTGGTAATGGTTCGTTTTACCTG  
GTGAAAAGAAACCATAATGGTTATCTCCCTCTTATACCCAGCAGGATAGGGGGTATAAGGCCGGGCCAT  
AGACTCTTAGGCACACTCATGAGTCGTCATAGGCACAATGAAACAAAGTCTGCTTAGCCTTT

>LoVo\_SLAMF1\_T7

AAAGATGCACTGACGTTTAGTGACTTTAGGAGACTCTTGTTCTTGACTCCAGTTCCTACCTTCCTCTGCT  
CTGGATGGAAAACCTGTGAATGTCCAAGAGGCAAGGTAGACTGGCCAGGAATACTCTAGGAAACATGAC  
AGTTTCATCTCAAACAAAATATAGAACTTACACCTGGTTTCTGGACTTGGGCATAGATCGTAAGGCTTTT  
TTTTCCCTGGTTGCCGGGAATGGTTCCTTTTTACTGGTGAACAAAAACCCTAAAGTTTACCCCTCCGG  
GCCCCACAAGAACTCCCTAATCCAACTGGTCCTAATGGCCTTTTGATAACCCCTTTTCCCAAGGCAC  
CATGGAAACCAAACCCTGGTAAAATGGCCACCAAATGGCCAACTTGTCTGAGGGAA

>LoVo\_SLAMF1\_M13

GGGGTCTTTAGGAGAATTAAGTTTTGGATCCATGTTCCCTCCCTTCTTTGTTTGAAGGAAAACCTGG  
AAAGTTCAACCGGCCAGGGAGGCCGGCCAGAATTCTTTGGGAACCAGGCCGGGTTCTTTTAAAAAAA  
AAAAAGAAATTTCCCTGGGTTTTGGGACTGGGGCAAGGTTGTAAGGGTTTTTTTTTCCACTGTTGTCTG  
GTAATGGTTCGTTTTACCTGGTGAAGAAGGCATAATCCATTTCCCTCCTATCCCCATCAGGATAGGGG  
TAAAAGGCCGGGTACAGACTCTTAGTGACATTAGTGAGTCGCATGGGCACAATGAAACAAAGGCCCTT  
TTTTAAACC

>Hec1B\_SLAMF1\_T7

ACGGTGACATGACGTTTAGTGACTTTAGTGAATCTCATTATCTTGATGCTGTTCCCCCTTCTACTGCTCT  
CCATGGTGTCTATCTGTTTCTAAAGCACAATGGAAACAAAGCCCTGTTTTGTGGCCACCTAATGGTCTT  
ATTTGTTCCGGGGACAAAGGGAAAACAACCCCTGGCTAGGGGTCCCCTTATGGTCAAGCTTTTTCCGGG  
GCAAAAGAAAAAAAACCCCTTTTTTTGTTCCCTTAAATGTCCAATTTTTCCGGGGTCAATTTACAAACC  
CCGTTTTTTTTTTTAAAAAGTCCCAAG

>Hec1B\_SLAMF1\_M13

TGGCGTTTGAAGAATTATACCCGGGCTTTTTTCTTTTTCCCGGTAAAACCCCTCGCCATTTTGGGCA  
CATTTTTCGAGGGTGTCTCCTTTTTCTCGGAACACGTTTACACTTTTGGGGCCCCTTGCCCGGGGTTT  
TTTTCCCTTTCTTTTTGTTACAATAAGAACCTTAAGAAAAAGGCGGCACGGGGTGTTCCTTGTGCCTT  
TAATACGACTCAGTATAGGGAAAAAAGACGGGCCATAGACGCCTAGTGACGTTAGTGAGTCGTCCTA  
GGCACAATGAAACAAAGTCTTGCTTAACCC

>Hec59\_SLAMF1\_T7

GGAAAGGGCCAGGGCACTTTTTGTGGACTTTAGGAGAACTCTTGTTCTTGACTCCTGTTCCCTACCTTC  
CTCTGCTCTGCAAGGAAAACCTGTGAATGTCCAACAGGCAAGGTAGACTGGCCAGGAATACTCTAGGAAA  
CATGACAGGTTCTCAAACAAAATATAGAACTTACACCTGGTTTCTGGACTTGGGCATAGATCGTAAG  
GCTTTTTTTTTTCCACTGTTGTCTGGTAATGGTTCGTTTTACCTGGTGAAGAAGAAACCATAATGGTTATCTC  
CCTCTGGTCCCCAGCAGGAGCTCCTTACTCAGACCTGGTCTTTACTGTCCTTTGCATACCCACTTTCCCA  
AGGGCACAATGGAAACAAAGCCCTGCTATAGTGTCACCTAAATGTCATAGCTGTTTCCTAAAG

>Hec59\_SLAMF1\_M13

TATTTTAATACGACCACTATAGGGTGTA AACGACGGCCCACTGACGTTTAGTGACTTTAGGAGAACTCT  
TGTTCTTGACTCCTGTTCCCTACCTCCTCTGCTCTGGATGGAAA ACTGTGAATGTCCAACAGGCAAGGTA  
GACTGGCCAGGAATACTCTAGGAAACATGACAGGTTTCATCTCAAACAAAATATAGA ACTTACACCTGGT  
TTCTGGACTTGGGCATAGATCGTAAGGCTTTTTTTTTTCCACTGTTGTCTGGTAATGGTTCTTTTACCTGG  
TGAAAAGAAACCATAATGGTTATCTCCCTTTTTCCCCAGCAGGAGCTCGGGAATAAGGCCGGGCCTTTA  
GACTCTTAGGCACACTCATGAGTCCCAAGGGCACAATGAAACAAAGTCATGCCAAAG

**Alignment\_result\_SLAMF1\_MS\_region:**

|                  |                                                                       |     |
|------------------|-----------------------------------------------------------------------|-----|
| LoVo_16_M13      | TTTTAAAAAAAAAAGAAATTTCCCTGGGTTTTGGGACTGGGGCAAGGTTGTAAGGGT             | 188 |
| HCT116_16_M13    | TTTCAAACAAAATAGAAATTACCCCTGGTTTTTGGAAATGGGCATAGATTGTAAGGGT            | 240 |
| Hec59_16_M13     | TCTCAAACAAAATATAGA ACTTACACCTGGTTTCTGGACTTGGGCATAGATCGTAAGGCT         | 239 |
| LoVo_16_T7       | TCTCAAACAAAATATAGA ACTTACACCTGGTTTCTGGACTTGGGCATAGATCGTAAGGCT         | 206 |
| HCT116_16_T7     | TCTCAAACAAAATATAGA ACTTACACCTGGTTTCTGGACTTGGGCATAGATCGTAAGGCT         | 204 |
| SLAMF1_reference | TCTCAAACAAAATATAGA ACTTACACCTGGTTTCTGGACTTGGGCATAGATCGTAAGGCT         | 202 |
| Hec59_16_T7      | TCTCAAACAAAATATAGA ACTTACACCTGGTTTCTGGACTTGGGCATAGATCGTAAGGCT         | 212 |
|                  | * * *** ** * **** * * * ***** ** ** * **** * * * ***** *              |     |
| LoVo_16_M13      | TTTTTTTTCCACTGTTGTCTGGTAATGGTTCGTTTTACCTGGTAAAAGAAGGCATAATT           | 248 |
| HCT116_16_M13    | TTTTTTTTCCACTGTTGTCTGGTAATGGTTCGTTTTACCTGGTAAAAGAAGGCATAATT           | 300 |
| Hec59_16_M13     | TTTTTTTTCCACTGTTGTCTGGTAATGGTTCGTTTTACCTGGTAAAAGAAGGCATAATT           | 299 |
| LoVo_16_T7       | TTTTTTTTCCCTGGTTGCCGGGAATGGTTCCTT-TTFACTGGTAAAAAAAAACCCATAAG          | 265 |
| HCT116_16_T7     | TTTTTTTTCCCTGGTTGCCGGGAAGGTTCTTTTTACCGGGAAAAAAAAAACCCATAAG            | 264 |
| SLAMF1_reference | TTTTTTTTCCACTGTTGTCTGGTAATGGTTCGTTTTACCTGGTAAAAGAAGGCATAATT           | 262 |
| Hec59_16_T7      | TTTTTTTTCCACTGTTGTCTGGTAATGGTTCGTTTTACCTGGTAAAAGAAGGCATAATT           | 272 |
|                  | ***** ** * **** * * * * * * * * * * * * * * * * * * * * * * * * * * * |     |

**Conclusion: MS\_related deletion in LoVo, HCT116**

**SLC35G2\_MS locus analysis:**

>SLC35G2\_reference  
AATTGATTATCTGAAGAAATGGATACTTCTCCCTCCAGAAAATATCCAGTTAAAAAACGGGTGAAAATAC  
ATCCAACACAGTGATGGTGAAATATACTTCTCATTATCCCCAGCCTGGCGATGATGGATATGAAGAAAT  
CAATGAAGGCTATGGAAATTTATGGAGGAAAATCCAAAGAAAGGTCTGCTGAGTGAATGAAAAAAA  
AAGGGAGAGCTTTCTTTGGAACCATGGATACCCTACCTCCACCAACAGAAGACCCAATGATCAATGAGA  
TTGGACAATTCCAGAGCTTTGCAGAAAAAACATTTTTCAATCCCGAAAAATGTGGATAGTGCTGTTTGG  
ATCTGCTTTGGCTCATGGATGTGTAGCTCTTATCACTAGGCTTGTTCGATCG

>HCT116\_SLC35G2\_T7  
GCCGGTAAGCTGAGATGGATACTTCTCCCTCCGAAATATCCGTTAAAAAACGGGTGAAAATACATCCCA  
ACACGGTGATGGTGAAATATACTTCTCATTATCCCCAGCCTGGCGATGATGGATATGAAGAAATCAATG  
AAGGCTATGGAAATTTTATGGAGGAAAATCCAAAGAAAGGTCTGCTGAGTGAATGAAAAAAAAAGGA  
AACTTTTTCTTTGAACCCTGGAAACCCCACTCCCCCAACAAAAACCCATGAATAATGAAATGGAAC  
ATTTCCGAACCTTTCCAAAAAAAACCTTTTTTCATCCCCAAAATGGGGAAATGTGGTTGTTGGAATTTCTT  
TGGGTCCAGGAAGTTTAACTTTTATCCCTAAGGCTGGTTCGTAATGGCCCCAAATGGCCAACCTTTTTTC  
CCGAGAAAA

>Hct116\_SLC35G2\_M13  
TTTTTTATTACGAACTCACATTGGGGGGTAAAAGGGGATATTCGGAGGAAAGGGTTATTTTTCTTCCGG  
AAAATTTCCGGTTAAAAAACGGGTGAAAATAATTCCACACCATGGATGTTGAATTTATTTTTCTTATTC  
CCCGCCCGGGGGTGGAGGGTTAGGAGGAATCCATGGAGGGTTAGGGAAATTTTAGGAGGGAAATTC  
AAGGAAAGTTTTGTGGATGGAAAGGAAAAAAAAGGGAGAGCTTTCTTTGGAACCATGGATACCCTACC  
TCCACCAACAGAAGACCCAATGATCAATGAGATTGGACAATTCCAGAGCTTTGCAGAAAAAACATTTTT



CAATCCCGAAAAATGTGGATAGTGCTGTTGGATCTGCTTTGGCTCAGGATGTGTAGCTCTATCACTAGGC  
TTGTTACTTACCCC

>LoVo\_SLC35G2\_T7

CCAGGAAATCTGAGATGGATACTTCTCCCTCCGAAATATCCGTTAAAAAACGGGTGAAAATACATCCCAA  
CACGGTGATGGTGAATATACTTCTCATTATCCCCAGCCTGGCGATGATGGATATGAAGAAATCAATGA  
AGGCTATGGAAATTTTATGGAGGAAAATCCAAAGAAAGGTCTGCTGAGTGAAATGAAAAAAAAAAGGGA  
GAGCTTTCTTTGGAACCATGGATACCCTACCTCCACCAACAGAAGACCCAATGATCAATGAGATTGGACA  
ATTCCAGAGCTTTGCAGAAAAAACATTTTTCAATCCCGAAAAATGTGGATAGTGCTGTTTGGATCTGCT  
TTGGCTCATGGATGTGTAGCTCTTATCACTAGGCTTGTCTGTAGTGTCACCTAAATGTCATACTGTTTC  
CTGG

>LOVO\_SLC35G2\_M13

TTCCCTCTTTTATTTTTCACTATAGGGTGTA AACGAGATTATCTGAAGAAATGGATACTTCTCCCTCCA  
GAAAATATCCAGTTAAAAAACGGGTGAAAATACATCCCAACACAGTGATGGTGAATATACTTCTCATT  
TCCCCAGCCTGGCGATGATGGATATGAAGAAATCAATGAAGGCTATGGAAATTTTATGGAGGAAAATCC  
AAAGAAAGGTCTGCTGAGTGAAATGAAAAAAAAAAGGGAGAGCTTTCTTTGGAACCATGGATACCCTAC  
CTCCACCAACAGAAGACCCAATGATCAATGAGATTGGACAATTCCAGAGCTTTGCAGAAAAAACATTTT  
TCAATCCCGAAAAATGTGGATAGTGCTGTTGGATCTGCTTTGGCTCAGGATGTGTAGCTCTTATCACTAG  
GCTTTTTTTGTTTTCTCC

>Hec1B\_SLC35G2\_T7

ACAGTTTATTCTGGAGATGGATACTTCTCCCTCCGAAATATCCGTTAAAAAACGGGTGAAAATACATCCC  
AACACGGTGATGGTGAATATACTTCTCATTATCCCCAGCCTGGCGATGATGGATATGAAGAAATCAAT  
GAAGGCTATGGGAATTTTATGGAGGAAAATCCAAAGAAAGGTCTGCTGAGTGAAATGAAAAAAAAAAGG  
GAGAGCTTTCTTTGGAACCATGGATACCCTACCTCCACCAACAGAAGACCCAATGATCAATGAGATTGG  
ACAATTCCAGAGCTTTGCAGAAAAAACATTTTTCAATCCCGAAAAATGTGGATAGTGCTGTTTGGATCT  
GCTTTGGCTCATGGATGTGTAGCTCTTATCACTAGGCTTGTCTGTAGTGTCACCTAAATGTCATAGCAT  
GTTTCCTGGGGAAAAA

>Hec1B\_SLC35G2\_M13

TCTTTCTATACTCATCTTCTATAGGGTGTA AACGAGATTATCTGAAGAAATGGATACTTCTCCCTCCAGA  
AAATATCCAGTTAAAAAACGGGTGAAAATACATCCCAACACAGTGATGGTGAATATACTTCTCATTATC  
CCCAGCCTGGCGATGATGGATATGAAGAAATCAATGAAGGCTATGGGAATTTTATGGAGGAAAATCCA  
AAGAAAGGTCTGCTGAGTGAAATGAAAAAAAAAAGGGAGAGCTTTCTTTGGAACCATGGATACCCTACCT  
CCACCAACAGAAGACCCAATGATCAATGAGATTGGACAATTCCAGAGCTTTGCAGAAAAAACATTTTTC  
AATCCCGAAAAATGTGGATAGTGCTGTTTGGATCTGCTTTGGCTCAGGATGTGTAGCTCTTATCACCTT  
AGGTCTTTTTTCTTAACTACC

>Hec59\_SLC35G2\_T7

ACATTTATTTTCTGAGAATGGATACTTCTCCCTCCAGAAATATCCGTTAAAAAACGGGTGAAAATACATC  
CCAACACGGTGATGGTGAATATACTTCTCATTATCCCCAGCCTGGCGATGATGGATATGAAGAAATCA  
ATGAAGGCTATGGGAATTTTATGGAGGAAAATCCAAAGAAAGGTCTGCTGAGTGAAATGAAAAAAAAA  
GGGAGAGCTTTCTTTGGAACCATGGATACCCTACCTCCACCAACAGAAGACCCAATGATCAATGAGATT  
GGACAATTCCAGAGCTTTGCAGAAAAAACATTTTTCAATCCCGAAAAATGTGGATAGTGCTGTTTGGAT  
CTGCTTTGGCTCATGGATGTGTAGCTCTTATCACTAGGCTTGTCTGTAGTGTCACCTAAATGTCATAGC  
TGTTTCCTGA

>Hec59\_SLC35G2\_M13

TTTTCTAATACGACTCACTATAGGGTGTAAAACGAGATTATCTGAAGAAATGGATACTTCTCCCTCCAGA  
 AAATATCCAGTTAAAAAACGGGTGAAAATACATCCCAACACAGTGATGGTGAATATACTTCTCATTATC  
 CCCAGCCTGGCGATGATGGATATGAAGAAATCAATGAAGGCTATGGGAATTTTATGGAGGAAAATCCA  
 AAGAAAGGTCTGCTGAGTGAATGAAAAAAAAGGGAGAGCTTTCTTTGGAACCATGGATACCCTACCT  
 CCACCAACAGAAGACCCAATGATCAATGAGATTGGACAATTCCAGAGCTTTGCAGAAAAAACATTTTTTC  
 AATCCCGAAAAATGTGGATAGTGCTGTTGGATCTGCTTTGGCTCAGGATGTGTAGCTCTACTAGGCT  
 GTTGCGTACCCC

**Alignment\_result\_SLC35G2\_MS\_region:**

|                   |                                                              |     |
|-------------------|--------------------------------------------------------------|-----|
| Hct116_17_M13     | AGGGTTAGGAAATTTTAGGAGGAAATCCAAAGAAAGTTTGTGGATGGAAAGGAAAA     | 237 |
| HCT116_17_T7      | AGGCTATGGAAATTTTATGGAGGAAAATCCAAAGAAAGGTCTGCTGAGTGAATGAAAA   | 199 |
| Hec59_17_T7       | AGGCTATGGGAATTTTATGGAGGAAAATCCAAAGAAAGGTCTGCTGAGTGAATGAAAA   | 203 |
| LoVo_17_T7        | AGGCTATGGAAATTTTATGGAGGAAAATCCAAAGAAAGGTCTGCTGAGTGAATGAAAA   | 199 |
| Hec1B_17_T7       | AGGCTATGGGAATTTTATGGAGGAAAATCCAAAGAAAGGTCTGCTGAGTGAATGAAAA   | 201 |
| Hec1B_17_M13      | AGGCTATGGGAATTTTATGGAGGAAAATCCAAAGAAAGGTCTGCTGAGTGAATGAAAA   | 238 |
| SLC35G2_reference | AGGCTATGGAAATTTTATGGAGGAAAATCCAAAGAAAGGTCTGCTGAGTGAATGAAAA   | 206 |
| LOV0_17_M13       | AGGCTATGGAAATTTTATGGAGGAAAATCCAAAGAAAGGTCTGCTGAGTGAATGAAAA   | 240 |
| Hec59_17_M13      | AGGCTATGGGAATTTTATGGAGGAAAATCCAAAGAAAGGTCTGCTGAGTGAATGAAAA   | 237 |
|                   | *** * ** ** ** * ** * ** * ** * ** * ** * ** *               |     |
| Hct116_17_M13     | AAAAGGGAGAGCTTTCTTTGGAACCATGGATACCCTACCTCCACCAACAGAAGACCCAAT | 297 |
| HCT116_17_T7      | AAAAGGAAAACTTTTCTTTGAACCCTGGAAACCCCAA-CTCCCCCACCACAAAAACCCAT | 258 |
| Hec59_17_T7       | AAAAGGGAGAGCTTTCTTTGGAACCATGGATACCCTACCTCCACCAACAGAAGACCCAAT | 263 |
| LoVo_17_T7        | AAAAGGGAGAGCTTTCTTTGGAACCATGGATACCCTACCTCCACCAACAGAAGACCCAAT | 259 |
| Hec1B_17_T7       | AAAAGGGAGAGCTTTCTTTGGAACCATGGATACCCTACCTCCACCAACAGAAGACCCAAT | 261 |
| Hec1B_17_M13      | AAAAGGGAGAGCTTTCTTTGGAACCATGGATACCCTACCTCCACCAACAGAAGACCCAAT | 298 |
| SLC35G2_reference | AAAAGGGAGAGCTTTCTTTGGAACCATGGATACCCTACCTCCACCAACAGAAGACCCAAT | 266 |
| LOV0_17_M13       | AAAAGGGAGAGCTTTCTTTGGAACCATGGATACCCTACCTCCACCAACAGAAGACCCAAT | 300 |
| Hec59_17_M13      | AAAAGGGAGAGCTTTCTTTGGAACCATGGATACCCTACCTCCACCAACAGAAGACCCAAT | 297 |
|                   | ***** * * ***** * ** * * *** * **** * ** ** * * ** *         |     |

**Conclusion: HCT116 has MS-related deletion**

**TTK\_MS locus analysis:**

>TTK\_reference

TTTCCCAACTGTAAGAACAAGAGAGAAATAAATGTATTATATTTAGAATACATCAAATACATCTACTGA  
 TGTGACAGTACATTTAACTAAAAAATTGCAAAACAGATTTGTGTTTTTAAATTTTACAGACTTTTATATGAACA  
 CTATAGTGGTGGTGAAGTCATAATTCTTCATCCTCCAAGACTTTTGAACCAACAGAAGACCCAAT  
 ATTTGCAGTTATTCGTAATGTCAGATACCACCTATAAAATATATTGGACTGTTATACTCTTGAATCCCTGT  
 GGAAATCTACATTTGAAGACAACATCACTCTGAAGTGTTATCAGCAAAAAAATTTCAGTAGATTATCTTT  
 AAAAGAAAATGTAATAAGCAACCACTTATGGCACTGTATATATTGTA

>HCT116\_TTK\_T7

GCGACTCTGTAGACAGAGAGATAGCTGCCTCATATGTGCACTGAGTGTACCTACATGTCCAGCTGTTTC  
 CTACATGTAATAAAAAATTGCAAAACAGATTTGTGTTTTTAAATTTTACAGACTTTTATATGAACACTATAGT  
 GGTGGTGAAGTCATAATTCTTCATCCTCCAAGACTTTTGAACCAACAGAAGACCCAATGAATTTGCA  
 TTTTCTTAATGGCCAAATCCCCCAATAAAAAAATTGGAATGGTAACTCCTGAAACCCTGGGGAAATC  
 CTACTTTTAAAAACACCTCCCTCCTAAATGGTTACCACCAAAAAAATTTTATAAAATAACCTTTAAAAAA  
 ACTGGTAAAATAACAACCCCTTTTGGGCCTGGGGTCCCAATGGTCAAACCTGTTTCTGGGGA

>HCT116\_TTK\_M13

TTTTTTTATTAGGACCATATTGGGGGGTAAAGGCCCAACGTTAGAACCAAGGGGAAATAAAAGTTTT  
 ATTATTTGAATACCTTCAAAAACCTTTTATGGATAGGCCGGTCCATTAAATTAATAAAATGCCAAACCGGA  
 TTGGGTTTTTAAATTTTCGACTTATTTGGACCACATTGGGGGGGGGGAAGTTCTAATTTTTTCTTCTCC  
 AGGATTTTGGAAAAAAGGGGAAAAAATGATTTGCAGTTATTCGTAATGTCAGATACCACCTATAAA

ATATATTGGACTGTTATATCTCTTGAATCCCTGTGGAAATCTACATTTGAAGACAACATCACTTGATTAAT  
ACGACTCAAATAGGGTGCAAAGGACCTAACTGAAAGAACAAGATAGAAATAGCAACCACTATGCGC  
TGCCC

>LoVO\_TTK\_T7

CAGGTCAGTCTAGACAGAGAGAATAGCAGTCTTATTTGCAATGACTGTCACCTACATGTCCAGATGT  
TTTCTGCATTTAACTAAAAAATTGCAAACAGATTTGTGTTTTTTAATTTAGACTTTTATATGAACACTAT  
AGTGGTGGTCAAAGTCATAATTCTTCATCCTCCAAGACTTTTGAAGAAAAAAGGGAAAAAAGAATTT  
CCATTTTCTAATGGCCAATACCCCCAATAAAAAAATTGGAATGGTAAACTCCTGAATCCCTGGGGAA  
ATCCACCTTTAAAAACACCTCCCTCCTAAATGGTATCCACCAAAAAAATTCATAAATTAACCTTTAAAA  
AAAACTTTAAAAATTACCACCACTTTAGGGAACGGTGGTCCCAATGGCAAACCGTTTTCTGGGGAA  
AA

>LoVO\_TTK\_M13

TTTTTTTATTAGGATTCATTTGGGGGGTAAAAGGCCCAACGTTAGGACCAGGGGGGAAATAAATGTTT  
TTTATTTGGATTCCTTCAAATACTTTTATGGATGGGCCGTCCATTTAATTAATAAATTGCAAACAGAT  
TTGTGTTTTTTAATTTCCGACTTTTTAGGACCACAATGGGGGGGGGAAATTTCTAATTTTTCTTCTTCCA  
GGATTTTGGAAAAAAGGGGAAAAAATGATTTGCAGTTATTCGTAATGTCAGATACCACCTATAAAA  
TATATTGGACTGTTATACTCTTGAATCCCTGTGGAAATCTACATTTGAAGACAACATCACTTGTTAATAC  
GCCTCAAAAAAAGGTCAGAAGGACCAACTGAAAGAACAAGTGAAGAAATAGCAACCACTATGCCTTACCC

>Hec1B\_TTK\_T7

CCGTCTCTGCTAGACAGAGAGATAGCTGTCTTATATTGTACGATTACTGCCAAATACATGTCCAGATATG  
ACCGTGCATTTAACTAAAAAATTGCAAACAGATTTGTGTTTTTTAATTTAGACTTTTATATGAACACTAT  
AGTGGTGGTCAAAGTCATAATTCTTCATCCTCCAAGACTTTTGAAGAAAAAAGGGGAAAAAAGAATTT  
CCATTTATCCTAATGGCCAAAACCCCCAATAAAAAAATTGGAATGGTAAACCCCTGGAACCCCGGGGA  
AATCCACCTTTAAAAACACCTCCCTCCTAAATGGTTACCACCAAAAAAATTCATAAATAACCTTTAAA  
AAAACTGGTAAAATAACCACCCCTTAGGGCCTGGTGGCCCCCAATGGCCAACTGGTTTCCGGGGGA  
AA

>Hec1B\_TTK\_M13

TTTTTTTATTAGGTTTACATTGGGGGGTAAAAGGCCCAACGTTAGGACCAGGGGGGAAATTAAGTTTT  
ATTATTTGGATTCCTTCAAACCTTTTATGGTTTGGCCGTCCATTAATTAATAAATGCCAAAACAAAT  
TGGGTTTTTTAATTTCCGACTTATTAGGACCACATTGGGGGGGGGAAAGTTCTAATTTTTCTTCTTCCA  
GGATTTTGGAAAAAAGGGGAAAAAATGATTTGCAGTTATTCGTAATGTCAGATACCACCTATAAAA  
TATATTGGACTGTTATACTCTTGAATCCCTGTGGAAATCTACATTTGAAGACAACATCACTCTGTTTGTGT  
TATCAGCAAAAAAATTCAGTAGGTCATCACTAAAAGAAAAGTGAATAAATAGCAACCACTTATGCCTTA  
GCT

>Hec59\_TTK\_T7

ACAGCACTGTAGACAGAGAGAATAAATGTATTATATTTAGAAGACATCAAATACATCTACAGATGTGA  
CAGTGCATTTAACTAAAAAATTGCAAACAGATTTGTGTTTTTTAATTTAGACTTTTATATGAACACTATA  
GTGGTGGTCAAAGTCATAATTCTTCATCCTCCAAGACTTTTGAAGAAAAAAGGGGAAAAAATGATTTG  
CAGTTATTCGTAATGTCAGATACCACCTATAAATATATTGGACTGTTATACTCTTGAATCCCTGTGGAAA  
TCTACATTTGAAGACAACATCACTCTGAAGTGTATCAGCAAAAAAATTCATTAAATAATCTTTAAAAAA  
AACTGTAAAAATACCAACCACTTAGGGCACTGGTGTACCTAAATGTCAAAGTTTTTTCCGGATA

>Hec59\_TTK\_M13

TTTTTTTATTAGGCCCTATTGGGTGTAAAACGACCAACTGTAAGAACCAGAGAGAAATAAATGTTTTAT  
ATTTAGAATACATCAAATACATTTAATGATGTGACCGTACATTTAATAAAAAAATTGCAAACAAAGATTT



TTTTTATTAGGATCCATTTTGGGTTTAAAACGGCGGGCGGGGAATTCAGCAAATTTTCCCCAGCCCAG  
ATTTTGCACCTGCCTTGGCAAATGGGGAATTGGGCCGTTAACCTTGGGGGAGGGAACCCGGGAATTTT  
TATCCGGAATGGGAAGGAGGAGAAGTTATCCAGGAGGCCAGTTTGAAGGAGGCCGGGTCAAAGAA  
GTCCGGCCGGGTGGGAGGCCCAATGGAGAACCCCTTTTTTTTTTGTGGACATGCCATCCATTTCTGTCAGG  
ATCTGGTTGATGACTCGGTGAGCAGCCCCACCACCATCTCCAATGTTACCTCCACGAGCCTTGGCAATCG  
AATCCAGCTCATCAAAGAATATTAATACGACTCACTATAGGGTGTACAACGACGGCGCGAGGACTCATG  
CAAGCACTAACAAACAGATCTTAGCCCC

>LOVO\_VCP\_T7

CACCGAACTGGCCGAGATCATGCAGCACTAACCAAACACTCAGTGTAGTCTTCGGCTGCTCGCCTATGATGT  
ACATGAGCTGCTTTCCTCAGAATTAGCCTTGAGGATGGCAACACGGGACTTCTCATCAGGAAGTGGGAT  
GTAGATGAGCTGATCAAGACGGCCAGGTCTGAGGATGGCAGGATCAATGATGTCAGGCCGGTTGGTAG  
CGCCAATGATGAACACATTTTTTTTTTGTGGACATGCCATCCATTTCTGTCAGGATCTGGTTGATGACTCGG  
TCAGCAACCCACCACCATCTCCAATGTTACCTCCACGAGCCTTGGCAATCCAATCCAGCTCATCAAAGA  
ATAGCACACAGGGGGCAGCTTGGCGGGCCTGTAGGAGGAATGGATTA

>LOVO\_VCP\_M13

CTTCCCCTTAATACGACTCACTATAGGGTGTAAAACGACGGCCGAGGACTCATGCAAGTCTCCCACAGCC  
CATGATCTTGACCTGCCTTGGCAAACGGGACTTGCAGGTTAGCCTTGAGGATGGCAACACGGGAC  
TTCTCATCAGGAAGTGGGATGTAGATGAGCTGATCAAGACGGCCAGGTCTGAGGATGGCAGGATCAAT  
GATGTCAGGCCGGTTGGTAGCGCCAATGATGAACACATTTTTTTTTTGTGGACATGCCATCCATTTCTGTC  
AGGATCTGGTTGATGACTCGGTGAGCAGCCCCACCACCATCTCCAATGTTACCTCCACGAGCCTTGGCAA  
TCGAATCCAGCTCATCAAAGAATTTAATACGACTCACATATAGGGTGTACAACGACGGCCGAGGACTC  
ATGCAAGCACTAACAAAACAGATTTGTTACT

>HEC1B\_VCP\_T7

ACAAGTGCAGATCATGCAGTCTCCCCAGACTATGTAGTCTCGCTGTCGCCTAAGTGTCTGGCTATTTCC  
TCAGGTTAGCCTTGAGGATGGCAACACGGGACTTCTCATCAGGAAGTGGGATGTAGATGAGCTGATCA  
AGACGGCCAGGTCTGAGGATGGCAGGATCAATGATGTCAGGCCGGTTGGTAGCGCCAATGATGAACAC  
ATTTTTTTTTTGTGGACATGCCATCCATTTCTGTCAGGATCTGGTTGATGACTCGGTGAGCAGCCCCACCAC  
CATCTCCAATGTTACCTCCACGAGCCTTGGCAATCGAATCCAGCTCATCAAAGAATAGCACACAGGGGG  
CAGCTTGGCGGGCCTGTAGGAGGAATGGATTGATTCAAGCACTAACAAAACACTAGATGTCTCGTGTACC  
TAAATGTCATAGCTGTTTCCTAAGGGGAAATCGGAGGACA

>HEC1B\_VCP\_M13

GATTTCCCTTAATACGACTCATTATAGGGTGTAAAACGACGGCCGAGGACTCATGCAAGTCTCCCACAG  
CCCATGATCTTGACCTGCCTTGGCAAACGGGACTTGCAGGTTAGCCTTGAGGATGGCAACACGGG  
ACTTCTCATCAGGAAGTGGGATGTAGATGAGCTGATCAAGACGGCCAGGTCTGAGGATGGCAGGATCA  
ATGATGTCAGGCCGGTTGGTAGCGCCAATGATGAACACATTTTTTTTTTGTGGACATGCCATCCATTTCTG  
TCAGGATCTGGTTGATGACTCGGTGAGCAGCCCCACCACCATCTCCAATGTTACCTCCACGAGCCTTGGC  
AATCGAATCCAGCTCATCAAAGAATTTAATACGACTCGCATATAGGGTGTACAACGAGCGGGCGAGAG  
GACTCATGCAAGCACTAACAGAATCTATGAGGTTTTGGACCTA

>HEC59\_VCP\_t7

CCGACGTGCCGAGGATCATGCAGTCTCCCCAAACTATGTATTCTCGCTGTCGCCTAAGTCTCATGAGCTA  
CTTTCCGAGGTTAGCCTTGAGGATGGCAACACGGGACTTCTCATCAGGAAGTGGGATGTAGATGAGCT  
GATCAAGACGGCCAGGTCTGAGGATGGCAGGATCAATGATGTCAGGCCGGTTGGTAGCGCCAATGATG  
AACACATTTTTTTTTTGTGGACTTGCCATCCATTTCTGTCAGGATCTGGTTGATGACTCGGTCAACACCC  
ACCACCATCTCCAATGTTACCTCCCCAAGCCTTGGCAATCGAATCCAGCTCATCAAAGAATAGCACACAG

GGGGCAGCTGGGCGGGCCTGTAGGAGGAATGGATTGATTCAAGCACTAACAAAATAAATGTCTCGTG  
 TCACCTAAATGTCATACCTTTTTCCGGAAAAAGGTCAAGATCTAGTAAAATGAAAACCAGAACTTCACC  
 AGACTGTCTCCAGCCACGTGTGTGGTTAATTTCTCTGCTAAATTGCTACACATAAAGCTTTTATTGGTCTG  
 CCACGCTTTGTTAGTCTTCCTGATGCTGGACAAATTCAGCACTAACAAAATAAGATGTCTCGTGTCCAC  
 TAAATGTCATAGCTGTTTCTGAGAGGAGAAGTGGG

>HEC59\_VCP\_M13

GGCCGAGGACTCATGCAAGTCTCCCATCAAGGCCCCCAAGTGCTGGGATTATATGAGCCACTGTCTC  
 TATCCCAGACAGCTTTCTAATTACTGGTTCTATATCCAAATTATGTTTAACTAAGAAATGAAGTAGCCTT  
 GAGAAGTTACACAAGCATTCCACGCATTATACCTTGTTTATTCGACTCACTATAGGGTGTAAAACGACGG  
 CCGAGGAATCATGCAAGTTTCCACCGCCCCTGATTTTGCACCTGCCTTGGCAAATGGGGACTTGCGCAG  
 GTTAGCCTTGAGGATGGCAACACGGGACTTCTCATCAGGAAGTGGGATGTAGGTGAGGTGATCAAGAC  
 GGCCAGGTTTGAGGATGGCAGGATCAATGATGTCAGGCCGTTGGTAGCGCCAATGATGAACACATTT  
 TTTTTGTGGACATGCCATCCATTTCTGTCAGGATCTGGTTGATGACTCGGTGAGCAGCCCCACCACCATC  
 TCCAATGTTACCTCCACGAGCCTTGGCAATCGAATCCAGCTCATCAAAGAATATTAATACGAGGGCGCAGA  
 TAGGGTGGACACAGGACGGCGCAGATGGACTCATGCAAGCACTAACAAAATAAGATTCTAAGCC

**Alignment\_result\_VCP\_MS\_region:**

```

Hct116_19_M13      GGCCAGTTTGAAGGAGGCCGGTCAAAGAAGTCCGGCCGGTGGGAGGCCAATGGAGA 235
HEC59_19_M13      GGCCAGTCTGAGGATGGCAGGATCAATGATGTCAGGCCGGTTGGTAGCGCCAATGATGA 408
LOV0_19_M13      GGCCAGTCTGAGGATGGCAGGATCAATGATGTCAGGCCGGTTGGTAGCGCCAATGATGA 239
HEC1B_19_M13     GGCCAGTCTGAGGATGGCAGGATCAATGATGTCAGGCCGGTTGGTAGCGCCAATGATGA 241
HCT116_19_T7     GGCCAGTCTGAGGATGGCAGGATCAATGATGTCAGGCCGGTTGGTAGCGCCAATGATGA 201
LOV0_19_T7       GGCCAGTCTGAGGATGGCAGGATCAATGATGTCAGGCCGGTTGGTAGCGCCAATGATGA 219
HEC59_19_t7      GGCCAGTCTGAGGATGGCAGGATCAATGATGTCAGGCCGGTTGGTAGCGCCAATGATGA 208
VCP_reference     GGCCAGTCTGAGGATGGCAGGATCAATGATGTCAGGCCGGTTGGTAGCGCCAATGATGA 196
HEC1B_19_T7      GGCCAGTCTGAGGATGGCAGGATCAATGATGTCAGGCCGGTTGGTAGCGCCAATGATGA 202
  ****  * * * * * * * * * * * * * * * * * * * * * * * * * * * * * * * * * * *

```

```

Hct116_19_M13     ACCCTTTTTTTTTTGTGGACATGCCATCCATTTCTGTCAGGATCTGGTTGATGACTCGGT 295
HEC59_19_M13     ACACATTTTTTTTTTGTGGACATGCCATCCATTTCTGTCAGGATCTGGTTGATGACTCGGT 468
LOV0_19_M13     ACACATTTTTTTTTTGTGGACATGCCATCCATTTCTGTCAGGATCTGGTTGATGACTCGGT 299
HEC1B_19_M13     ACACATTTTTTTTTTGTGGACATGCCATCCATTTCTGTCAGGATCTGGTTGATGACTCGGT 301
HCT116_19_T7     ACACATTTTTTTTTTGGGAACCTCCCTTTTTTTTTTTCAGGATTGGGTTAAGAATTCGTC 261
LOV0_19_T7       ACACATTTTTTTTTTGTGGACATGCCATCCATTTCTGTCAGGATCTGGTTGATGACTCGGT 279
HEC59_19_t7      ACACATTTTTTTTTTGTGGACTTGCCATCCATTTCTGTCAGGATCTGGTTGATGACTCGGT 268
VCP_reference     ACACATTTTTTTTTTGTGGACATGCCATCCATTTCTGTCAGGATCTGGTTGATGACTCGGT 256
HEC1B_19_T7      ACACATTTTTTTTTTGTGGACATGCCATCCATTTCTGTCAGGATCTGGTTGATGACTCGGT 262
  * * * * * * * * * * * * * * * * * * * * * * * * * * * * * * * * * * *

```

**Conclusion: HCT116 has MS-related deletion**

**DCAF13\_MS locus analysis:**

>DCAF13\_reference

GTAATGAAAAAATCCTCTTAACCTTTTTGCTTTAAAGACAGTGTATACTGGGATTGATCATCACTGGA  
 AAGAAGCTGTTTTGCCACATGTGGACAGCAAGTAGACATTTGGGATGAACAAAGAATAATCCTATAT  
 GTTCAATGACCTGGGGATTTGACAGTATAAGTAGTGTTAAATTTAACCCAATTGAGGTAATGTTTTTTTT  
 AAGTATGTTTTACTTATTATGGCTTAATAATTTAGTTCTGTTTAAAACTTTGAATGTATGATAGAAA  
 CTTCTGAATTTAATGGTGTTTTGGCATTGTCAGTTTTCCCGATTGTAAATGAGTTCTGATACCTTTGCT  
 CAAATCCCAACATGTTTCCAGCAGTTTAGTCCAGATACTAGAGTTA

>HCT116\_DCAF13\_T7

ACAGACTGCAGTGTAACTGGGATTGATCATCACTGGAAGAAGCTGTTTTGCCACATGTGGACAGCAA  
 GTAGACATTTGGGATGAACAAAGAATAATCCTATATGTTCAATGACCTGGGGATTTGACAGTATAAGT

AGTGTTAAATTTAACCCAATTGAGGTAATGTTTTTTTTTAAGTATGTTTTACTTATTATGGCTTAATAATTT  
CAGTTCTGTTTAGAAAACCTTTGAATGTATGATAGAAAACCTTCTGAATTTAATGGTGTTTTGGCATTGTTGT  
CAGTTTTCCCGATTGTAATGAGTTCTGATACCTTTGCTCAAATCCCAACATGTTCCAGCAGTTTAGTC  
CCAGATACTAGAGTAGTGTCACCTAAATGTCATACTTGTTCCTAAAGAAC

>HCt116\_DCAF13\_M13

TTCCTGTTTTAATATCGTCTCACTATAGGGTGTAACGACGGCCAGTGTATACTGGGATTGATCATCA  
CTGGAAAGAAGCTGTTTTGCCACATGTGGACAGCAAGTAGACATTTGGGATGAACAAAGAATAATCC  
TATATGTTCAATGACCTGGGGATTGACAGTATAAGTAGTGTTAAATTTAACCCAATTGAGGTAATGTTT  
TTTTTAAGTATGTTTTACTTATTATGGCTTAATAATTTAGTTCTGTTTAGAAAACCTTTGAATGTATGAT  
AGAAAACCTTCTGAATTTAATGGTGTTTTGGCATTGTTGTCAGTTTTCCCGATTGTAATGAGTTCTGATACC  
TTTGCTCAAATCCCAACATGTTCCAGCAGTTTATCCAGAACAGAGGTACCCCT

>LOVO\_DCAF13\_T7

ACGGGCGGGCAGTGTAACGGGGATTGATCATCACTGGAAGAAGCTGTTTTGCCACATGTGGACAGCA  
AGTAGACATTTGGGATGAACAAAGAATAATCCTATATGTTCAATGACCTGGGGATTGACAGTATAAG  
TAGTGTTAAATTTAACCCAATTGAGGTAATGTTTTTTTTAAATTAGTTTTTATTAATAAGGGTTAATAATTT  
TCATTTGTTTAAAAAATTTTGAAGGAAGAAAAAACCTTCGAAATTTAAAGGGGGTTTGGCCTTTTG  
GCCATTTCCCAATGGAAATGAATCCGAAACCTTGCCCAATCCCACTGGTTCCCAACCATTTAAT  
CCCAAAACCAAAATAATGGCCCCAAATGGCCAAACTTTTTCCAGAGGAA

>LOVO\_DCAF13\_M13

TTCCTTTTTAATTAGGACCCACATTGGGGGTTAAAAGGAGGCCCGGGGTTTATGGGGATTATTCTCCACG  
GAAAGGAGGTGTTTTGCCCCAGGGGGCCGCAAGGTGGCCTTTGGGGAGGACCAAGAAATTATTCCA  
TTATTTCAATGACCCGGGGGTTTGGCCGTTTAGTTGGTTTAAAATTAACCCAATGGGGTAAAGGTTTT  
TTTTAAGTATGTTTTACTTATTATGGCTTAATAATTTAGTTCTGTTTAGAAAACCTTTGAATGTATGATAG  
AAACTTCTGAATTTAATGGTGTTTTGGCATTGTTGTCAGTTTTCCCGATTGTAATGAGTTATGATACCTCT  
GCTCAAATCCCAACATGTTCCAGCAGTTAGTCCAGAACAGAGGTAGCCCT

>HEC1B\_DCAF13\_T7

GCGGGCCTGCAGATGTATACTGGGATTGATCATCACTGGAAGAAGCTGTTTTGCCACATGTGGACAGC  
AAGTAGACATTTGGGATGAACAAAGAATAATCCTATATGTTCAATGACCTGGGGATTGACAGTATAA  
GTAGTGTTAAATTTAACCCAATTGAGGTAATGTTTTTTTTAAGTATGTTTTACTTATTATGGCTTAATAAT  
TTCAGTTCTGTTAATAAACTTTTGAATGCAGGATAAAAACCTTCGGAATTTAAAGATGTTATGACTTTTT  
TTTGGACCCCAATGCTTCTTGATGGCTCTAAGGGGCAACAGCTTCTTTCCGTGTTGCTCATCCCTT  
AGTAAAAACATCCTAAAGTTTTGTCCCCTTTTTTCACTGTTTCAGACACGCC

>HEC1B\_DCAF13\_M13

TCCCTGATTTTATATCGACTCACTATAGGGTGTAACGACGGCCAGTGTATACTGGGATTGATCATCAC  
TGAAAGAAGCTGTTTTGCCACATGTGGACAGCAAGTAGACATTTGGGATGAACAAAGAATAATCCT  
ATATGTTCAATGACCTGGGGATTGACAGTATAAGTAGTGTTAAATTTAACCCAATTGAGGTAATGTTTT  
TTTTAAGTATGTTTTACTTATTATGGCTTAATAATTTAGTTCTGTTTAGAAAACCTTTGAATGTATGATA  
GAACTTCTGAATTTAATGGTGTTTTGGCATTGTTGTCAGTTTTCCCGATTGTAATGAGTTCTGATACCT  
TTGCTCAAATCCCAACATGTTCCAGCAGTTTAGTACCAGATTATTTGCATTTACCC

>HEC59\_DCAF13\_T7

ACGAATGCAGTGTAACGGGATTGATCATCACTGGAAGAAGCTGTTTTGCCACATGTGGACAGCAAGT  
AGACATTTGGGATGAACAAAGAATAATCCTATATGTTCAATGACCTGGGGATTGACAGTATAAGTAG  
TGTTAAATTTAACCCAATTGAGGTAATGTTTTTTTTAAGTATGTTTTACTTATTATGGCTTAATAATTTCA  
GTTCTGTTTAAAAAATTTTGAATGTATGAAAAAATCTCTGAATTTAATGGGGTTTTGGCATTGTTGTC

GTTTTCCCGATTGGAAATGAATTCTGAAACCTTTGCTCAAATCCCAACATGTTTCCCAGCAATTTAATCCC  
AAATACTAAAGTAATGTCACCTAAATGTCAAACTTTTTCCGGGATA

>HEC59\_DCAF13\_M13

TTTTTTTTTTGGAACCACAATAGGGTGTAAAACGACGGCCAGTGTTTACTGGGATTGATCATCACGGGAA  
AGAAGCTGTTTTGCCACATGTGGACAGCAAGTAGACATTTGGGATGAACAAAGAATTAATCCAATATG  
TTCAATGACCTGGGGATTTGACGGTATAAGTAGTGTTAAATTTAACCCAATTGAGGTAATGTTTTTTTTTA  
AGTATGTTTTACTTATTATGGCTTAATAATTTAGTTCTGTTTAGAAAACTTTTGAATGTATGATAGAAAC  
TTCTGAATTTAATGGTGTTTGGCATTGTCAGTTTTCCCGATTGTAATGAGTTCTGATACCTTTGCTC  
AAATCCCAACATGTTCCCAGCAGTTTAGTCCCAGAACAGAGAAGCCC

**Alignment\_result\_DCAF13\_MS\_region:**

|                  |                                                             |     |
|------------------|-------------------------------------------------------------|-----|
| HEC1B_20_T7      | TTAAATTTAACCCAATTGAGGTAATGTTTTTTTTTAAGTATGTTTACTTATTATGGCTT | 204 |
| LOVO_20_M13      | TTAAATTTAACCCAATGGGGTAAAGTTTTTTTTTAAGTATGTTTACTTATTATGGCTT  | 237 |
| LOVO_20_T7       | TTAAATTTAACCCAATTGAGGTAATGTTTTTTTTTAAGTATGTTTACTTATTATGGCTT | 202 |
| HEC1B_20_M13     | TTAAATTTAACCCAATTGAGGTAATGTTTTTTTTTAAGTATGTTTACTTATTATGGCTT | 239 |
| Hct116_20_M13    | TTAAATTTAACCCAATTGAGGTAATGTTTTTTTTTAAGTATGTTTACTTATTATGGCTT | 240 |
| HEC59_20_M13     | TTAAATTTAACCCAATTGAGGTAATGTTTTTTTTTAAGTATGTTTACTTATTATGGCTT | 234 |
| DCAF13_reference | TTAAATTTAACCCAATTGAGGTAATGTTTTTTTTTAAGTATGTTTACTTATTATGGCTT | 235 |
| HCT116_20_T7     | TTAAATTTAACCCAATTGAGGTAATGTTTTTTTTTAAGTATGTTTACTTATTATGGCTT | 202 |
| HEC59_20_T7      | TTAAATTTAACCCAATTGAGGTAATGTTTTTTTTTAAGTATGTTTACTTATTATGGCTT | 200 |

\*\*\*\*\* \*\* \* \* \* \* \*\*\*\*\* \* \*\*\*\*\* \*\* \* \* \*\*\*\*\* \* \* \* \* \* \* \* \*

**Conclusion: LOVO has MS-related deletion**
